# Supplementary material for: Glycine inhibits NINJ1 membrane clustering to suppress plasma membrane rupture in cell death
Source: eLife. 2022 Dec 5;11:e78609. doi: 10.7554/eLife.78609 (PMC9754625; doi:10.7554/eLife.78609)
Supplement: Figure 1—figure supplement 1—source data 1. [file elife-78609-fig1-figsupp1-data1.xlsx]

## Sheet: Figure 1  Figure suppl 1
Figure 1 - Figure Supplement 1: Glycine dose response and amino acid hierarchy in mouse macrophages
Figure 1 - Figure Supplement 1A -- Dose response (LDH)						Figure 1 - Figure Supplement 1B -- amino acids (LDH)
										Amino acid at 5 mM				Amino acid at 15 mM
		LPS + Nigericin				Experiment	Basal	LPS	LPS + Ng	Gly 5	Ala 5	Ser 5	Val 5	Gly 15	Ala 15	Ser 15	Val 15
	Glycine (mM)	1x	2x	Avarage:		1	8.84225	14.2258	86.7517	58.2617	72.7273	85.553	82.6284	44.5464	45.0082	86.861	83.2142
	[LPS alone]	1.97007	0.488063	1.22907		2	1.748	0	77.5529	20.5931	31.373	72.7749	74.0454	17.2949	17.6624	71.7486	81.8645
	0	63.9298	58.623	61.2764		3	11.2467	2.48568	80.3685	61.3091	75.6866	83.3773	84.7292	57.4997	51.1313	84.3805	79.1394
	1	43.7639	28.876	36.3199		4	8.09629	1.82066	86.6389	38.3434	69.7571	79.3855	83.1444	40.3263	38.4041	80.8485	82.7449
	2	20.1574	11.1461	15.6518
	5	7.44403	4.44208	5.94306
	10	5.50089	5.18048	5.34068
	15	5.79071	4.92378	5.35725		Figure 1 - Figure Supplement 1C -- amino acids (NINJ1 native-PAGE)
	25	6.24753	9.22835	7.73794
