# Supplementary material for: Glycine inhibits NINJ1 membrane clustering to suppress plasma membrane rupture in cell death
Source: eLife. 2022 Dec 5;11:e78609. doi: 10.7554/eLife.78609 (PMC9754625; doi:10.7554/eLife.78609)
Supplement: Figure 1—figure supplement 2—source data 1. [file elife-78609-fig1-figsupp2-data1.xlsx]

## Sheet: Figure 1 - Figure suppl 2
Figure 1 - Figure Supplement 2 (RAW-asc)
Figure 1 - Figure Supplement 2A -- Ninj1 KO					Figure 1 - Figure Supplement 2B -- LDH release nigericin								Figure 1 - Figure Supplement 2D -- Native PAGE
						Ninj1 Wildtype			Ninj1 Knockout
					Experiment	1	2	3	1	2	3
					LPS	0.1	0.05	0.042	1	0.16	0.07
					LPS + Ng	35.4	20.22	24.7	4.41	4.61	4.22
					LPS + Ng + Gly	14.18	3.9	9.18	12.77	8.74	13.13
				GAPDH
				NINJ1
				GAPDH
				NINJ1
