# Supplementary material for: Glycine inhibits NINJ1 membrane clustering to suppress plasma membrane rupture in cell death
Source: eLife. 2022 Dec 5;11:e78609. doi: 10.7554/eLife.78609 (PMC9754625; doi:10.7554/eLife.78609)
Supplement: Figure 1—source data 1. [file elife-78609-fig1-data1.xlsx]

## Sheet: Figure 1
Figure 1
Figure 1A -- Ninj1 KO							Figure 1B -- LDH release nigericin
SDS-PAGE (NINJ1)								Ninj1 Wildtype			Ninj1 Knockout
							Experiment	1	2	3	1	2	3
							LPS	0.71	0.81	0.64	0.5	0.42	0.5
							LPS + Ng	51.9	60.4	49	30.9	30.49	22.32
							LPS + Ng + Gly	19	22.1	19.15	31.4	26.73	28.23
							Figure 1C -- LDH release ABT-199
								Ninj1 Wildtype			Ninj1 Knockout
							Experiment	1	2	3	1	2	3
							LPS	25.94	10.2	9.79	10.11	7.85	2.57
							LPS + Ng	90.83	74.21	78.6	26.64	40.1	27.7
							LPS + Ng + Gly	55.88	48.1	52.26	32.3	37.11	24.68
SDS-PAGE (GAPDH and NINJ1)							Figure 1D -- LDH release pneumolysin
								Ninj1 Wildtype			Ninj1 Knockout
							Experiment	1	2	3	1	2	3
							LPS	0.3	1.42	1.08	0.63	1.46	0.8
							LPS + Ng	45.31	43.81	53.08	16.56	21.14	19.6
							LPS + Ng + Gly	30.62	28.58	22.06	17.98	26.02	24.45
