# Supplementary material for: Glycine inhibits NINJ1 membrane clustering to suppress plasma membrane rupture in cell death
Source: eLife. 2022 Dec 5;11:e78609. doi: 10.7554/eLife.78609 (PMC9754625; doi:10.7554/eLife.78609)
Supplement: Figure 2—figure supplement 1—source data 1. [file elife-78609-fig2-figsupp1-data1.xlsx]

## Sheet: Figure 2  Figure suppl 1
Figure 2 - Figure Supplement 1: Glycine dose response primary human macrophages : LDH
LDH release
LDH release normalised to lysis control. Triplicate wells with MDMs per condition:
		LPS + Nigericin
	Glycine (mM)	1x	2x	3x	Avarage:
	0	28.8913	27.1322	22.3881	26.1372
	1	22.6013	20.4158	16.6844	19.9005
	5	14.6588	13.4861	15.1386	14.4279
	10	11.6738	12.9531	11.9403	12.1891
	25	4.95736	5.4371	6.5565	5.65032
	50	7.35608	9.16844	5.86354	7.46269
