# Supplementary material for: Glycine inhibits NINJ1 membrane clustering to suppress plasma membrane rupture in cell death
Source: eLife. 2022 Dec 5;11:e78609. doi: 10.7554/eLife.78609 (PMC9754625; doi:10.7554/eLife.78609)
Supplement: Figure 2—figure supplement 2—source data 1. [file elife-78609-fig2-figsupp2-data1.xlsx]

## Sheet: Figure 2 - Figure suppl 2
Figure 2 - Figure Supplement 2: Necroptosis primary human macrophages
LDH release
LDH release normalised to lysis control from duplicate wells per condition:
Normalised
	Donor 1	Donor 2	Donor 3
No Stimuli	0.614948	1.13529	3.1811
Glycin	0.283822	1.2772	1.51181
zVAD + BV6 +TNFa	22.895	20.719	13.5748
zVAD + BV6 +TNFa + Glycin	25.9697	27.9092	23.4331
