# Supplementary material for: Glycine inhibits NINJ1 membrane clustering to suppress plasma membrane rupture in cell death
Source: eLife. 2022 Dec 5;11:e78609. doi: 10.7554/eLife.78609 (PMC9754625; doi:10.7554/eLife.78609)
Supplement: Figure 2—figure supplement 3—source data 1. [file elife-78609-fig2-figsupp3-data1.xlsx]

## Sheet: Figure 2 - Figure suppl 3
Figure2 - Figure Supplement 3: Time course TMRE, CellTiterGlo, LDH, blebbing
MDMs induced to undergo pyroptosis with or without glycine
TMRE
TMRE mitochondrial potential dye added before automated microscopy (widefield fluorescence and brightfield).								LDH release from triplicate wells with huMDMs normalised to lysis control
Number of TMRE positive cells normalised to t=0
Experiment 1					Experiment 2
TMRE	LPS	LPS+Ng	LPS+Ng+Gly		TMRE	LPS+Ng	LPS+Ng+Gly		CellTracker Deep Red	LPS+Ng	LPS+Ng+Gly
0h	100	100	100		0h	100	100		0h
2h	99.7	92.7	86.2		2h	94.3	92.9		2h
6h	95.2	84.2	79.2		6h	28.7	15.7		6h
18h	74.5	40	56.4		22h	1.5	0		22h
Raw data (actual number of cells per time point)					Raw data (actual number of cells per time point)				Raw data (actual number of cells per time point)
0h	355	443	330		0h	135	154		0h	136	153
2h	329	382	329		2h	132	143		2h	140	154
6h	299	351	314		6h	39	24		6h	136	153
18h	142	250	246		22h	2	0		22h	130	152
LDH
Donor x	-	LPS	LPS+Ng	LPS+Ng+Gly
2h	3.49	2.25	15.08	9.44
6h	-5.08	-9.62	18.64	8.09
18h	-4.94	-13.46	41.9	26.96
Donor 3	-	Glycin	LPS	LPS+Ng	LPS+Ng+Gly
2h	1.06	1.15	0.89	9.04	1.68
6h	12.14	11.27	13.44	69.8	39.31
22h	6.32054	5.86907	6.93325	22.5411	18.7036
Raw data
Donor x	2 hours			6 hours			17 hours
untreated	0.0155		0.0295	-0.0275	-0.0305	-0.0315	0.0075	-0.0295	-0.0395
LPS	0.0075	0.0255	0.0105	-0.0575	-0.0535	-0.0585	-0.0555	-0.0525	-0.0595
LPS+N	0.1025	0.1035	0.0855	0.1075	0.1245	0.0965	0.1765	0.1675	0.1775
LPS+N+G	0.0335	0.1105	0.0385	0.0475	0.0485	0.0465	0.1205	0.1055	0.1095
lysis control	0.6125	0.7015	0.6185	0.5185	0.6005	0.6435	0.4375	0.4085	0.3985
Donor 3:	2 hours			6 hours			22 hours
untreated	0.062	0.078	0.067	0.054	0.057	0.054	0.072	0.068	0.062
Glycin	0.069	0.071	0.068	0.053	0.053	0.053	0.063	0.063	0.062
LPS	0.063	0.074	0.068	0.064	0.057	0.053	0.082	0.068	0.071
LPS+N	0.1	0.102	0.095	0.195	0.197	0.172	0.26	0.228	0.217
LPS+N+G	0.071	0.073	0.07	0.127	0.117	0.109	0.212	0.183	0.191
lysis control	0.425	0.366	0.337	0.242	0.231	0.219	0.98	1.008	1.113
CellTiterGlo
Normalized to medium control and presented as relativ to untreated control for each donor:
	Untreated	Glycin	LPS	LPS + Nigericin	LPS + Nigericin + Glycin
Donor 1, 2 h:	100	101.407	91.6005	50.3943	54.1973
Donor 2, 2 h:	100	102.725	88.0959	56.5071	58.4968
Donor 3, 2 h	100	88.2124	94.0183	20.9674	24.5134
Donor 3, 6 h	100	90.3509	88.3454	6.42051	5.21913
Donor 3, 22 h	100	109.921	118.661	6.28785	3.96097
Raw data (Luciferase 1.0 sek)
	Untreated	Glycin	LPS	LPS + Nigericin	LPS + Nigericin + Glycin	Replicate:
Donor 1:	90308	94214	82612	44929	51133	1
	95384	95778	88324	50134	51208	2
	100996	100707	91806	50205	53769	3
Donor 2:	50372	50747	41943	27105	27904	1
	50305	53196	45488	29283	29632	2
	50644	51458	46067	29815	31646	3
Donor 3, 2h:	49875	37680	43085	10692	10903	1
	46710	43778	44347	9446	12229	2
	44638	43267	45419	10471	12440	3
Donor 3, 6h:	50773	44163	40657	2640	2250	1
	46686	43279	44731	3421	3245	2
	50944	46729	45825	4316	3110	3
Donor 3, 22h:	27893	34139	38196	1569	1088	1
	30416	33888	35958	2183	1441	2
	35414	34918	36916	2859	1919	3
