# Supplementary material for: Glycine inhibits NINJ1 membrane clustering to suppress plasma membrane rupture in cell death
Source: eLife. 2022 Dec 5;11:e78609. doi: 10.7554/eLife.78609 (PMC9754625; doi:10.7554/eLife.78609)
Supplement: Figure 2—source data 1. [file elife-78609-fig2-data1.xlsx]

## Sheet: Figure 2
Figure 2
Figure 2A -- LDH release
Average LDH measurements from triplicate wells per condition and donor
Normalised	siCtrl 20 nM				siNINJ1 20 nM
	Donor 1	Donor 2	Donor 3	Donor 4	Donor 1	Donor 2	Donor 3	Donor 4
LPS + N	100	100	100	100	33.8357	20.6573	11.5385	26.0593
LPS + N + Glycine	49.0034	41.4906	46.7391	27.9131	26.0088	23.6502	19.3144	22.5106
LPS	41.2737	34.9178	28.4281	44.3856	8.02139	14.9648	9.0301	13.7182
No stimuli	32.3772	31.6901	35.8696	27.9131	15.2649	15.9624	24.9164	15.8369
Raw data	siCtrl 20 nM				siNINJ1 20 nM
	Donor 1	Donor 2	Donor 3	Donor 4	Donor 1	Donor 2	Donor 3	Donor 4
LPS + N	0.685667	0.568	0.398667	0.629333	0.232	0.117333	0.046	0.164
LPS + N + Glycine	0.336	0.235667	0.186333	0.175667	0.178333	0.134333	0.077	0.141667
LPS	0.283	0.198333	0.113333	0.279333	0.055	0.085	0.036	0.0863333
No stimuli	0.222	0.18	0.143	0.175667	0.104667	0.0906667	0.0993333	0.0996667
