# Supplementary material for: Glycine inhibits NINJ1 membrane clustering to suppress plasma membrane rupture in cell death
Source: eLife. 2022 Dec 5;11:e78609. doi: 10.7554/eLife.78609 (PMC9754625; doi:10.7554/eLife.78609)
Supplement: Figure 3—source data 1. [file elife-78609-fig3-data1.xlsx]

## Sheet: Figure 3
Figure 3
Figure 3A -- Native-PAGE and SDS					Figure 3C-D -- TIRF microscopy NINJ1 density and intensity																Figure 3E -- STED microscopy Full-width at half max (nm)						Figure 3F-G -- STED microscopy NINJ1 density and intensity
Native-PAGE					Individual experiment density (puncta/um^2) means							Individual experiment normalized intensity (a.u.) means										Confocal	STED				Individual experiment density (relative units) means							Individual experiment intensity (relative units) means
																						248.324	65
					Experiment	LPS	LPS+Ng	LPS+Ng+Gly				Experiment	LPS	LPS+Ng	LPS+Ng+Gly							190.749	50				Experiment	LPS	LPS+Ng	LPS+Ng+Gly				Experiment	LPS	LPS+Ng	LPS+Ng+Gly
					1	0.381644	0.202651	0.301712				1	1.00002	1.22584	1.13991							186.689	72				1	1	0.355239	0.810826				1	1	1.96717	0.958091
					2	0.305925	0.123862	0.325354				2	0.999987	0.926732	0.966825							388.5	71				2	1	0.639051	0.951104				2	1	1.24188	1.23992
					3	0.341797	0.141264	0.229746				3	0.999989	1.31036	1.07065							422.03	76				3	1	0.642774	1.02989				3	1	2.01791	1.20157
																						156.421	56
					Individual cell NINJ1 puncta density (pooled three individual experiments) for violin plot							Normalized individual cell NINJ1 puncta intensity (pooled 3 individual experiments) for violin plot										420.787	74				Normalized individual cell NINJ1 puncta density (pooled 3 individual							Normalized individual cell NINJ1 puncta intensity (pooled three individual
																						295.116	61				experiments) for violin plot							experiments) for violin plot
						LPS	LPS Ng	LPS Ng +Gly					LPS	LPS+Ng	LPS+Ng+Gly							305.111	61					LPS	LPS Ng	LPS Ng +Gly					LPS	LPS+Ng	LPS+Ng+Gly
						0.401947	0.204932	0.255981					1.03053	1.13479	0.907359							256.706	55					0.644782	0.362764	0.811761					0.86568	1.83864	1.19002
						0.432085	0.238386	0.402532					1.49988	1.46068	0.895404							152.975	57					0.790636	0.203188	0.739589					0.853872	2.4973	0.807053
						0.547681	0.089368	0.155481					1.03572	0.953846	0.941748							395.062	59					1.12634	0.79669	0.640145					1.14408	2.66444	0.656872
						0.473545	0.196308	0.408948					1.12155	1.24463	0.915313							209.506	66					0.982396	0.275156	1.17574					0.658321	1.10472	0.91084
						0.225501	0.133164	0.266527					0.734413	1.01929	1.13822							156.611	60					1.55125	0.424024	0.494388					1.14216	1.25463	0.957012
						0.328773	0.407532	0.245898					0.767897	0.949035	1.30574							274.66	61					0.984623	0.175229	0.837496					1.38984	2.89818	1.16264
						0.3718	0.164962	0.365154					1.25844	1.05392	1.18342													0.803574	0.380651	1.02343					0.895624	1.36423	1.30579
						0.327386	0.171984	0.507964					0.781615	1.3085	1.60071													1.1164	0.224207	0.764061					1.05042	2.11523	0.674494
						0.241817	0.27539	0.218166					0.811003	1.18776	1.29274													0.935509	0.571167	0.868084					0.870479	1.52517	1.61308
						0.465906	0.14142	0.527544					0.959133	1.42181	1.34699													0.943535	0.708401	0.892333					0.741334	1.10719	1.37973
						0.259379	0.191433	0.131242					0.691293	1.27435	1.0884													0.988349	0.808857	1.0262					0.962724	0.92231	1.31911
						0.292334	0.149041	0.296886					1.05878	1.47459	0.868683													1.01238	0.68826	0.762425					0.813122	1.08264	1.42144
						0.308832	0.191004	0.435835					0.991145	1.02015	1.08231													1.08766	0.75667	0.985831					0.991507	0.766298	1.25908
						0.410559	0.248571	0.199839					1.1996	1.38614	0.940271													0.983561	0.852269	0.986203					1.19352	1.13755	1.20608
						0.34735	0.241623	0.317198					1.06538	1.35246	0.942701													1.037	0.744758	1.01023					1.03103	1.54951	1.04176
						0.291971	0.197306	0.117251					1.04041	1.37147	0.79457													1.02247	0.632088	0.943796					1.11919	1.63013	1.00207
						0.253566	0.0938261	0.237073					0.912428	0.801568	1.37695													0.973205	0.610161	0.98342					1.30918	1.27367	1.14584
						0.282283	0.0770561	0.174762					0.987596	0.68201	1.00405													1.01633	0.734502	0.924277					0.967914	1.61723	1.29402
						0.375413	0.0701255	0.382503					1.20249	0.808121	1.60519													0.792806	0.337315	1.04964					0.744013	1.43373	1.07972
SDS-PAGE (NINJ1)						0.261557	0.0420453	0.224166					0.740482	0.606764	1.20653													0.830159	0.362041	0.980795					0.858316	1.39824	1.11707
						0.24966	0.0553735	0.246208					0.850757	1.07626	1.24215													1.17029	0.625039	1.41239					0.989164	1.12932	0.894419
						0.294061	0.16031	0.520499					1.10868	1.37069	1.39867													1.31778	0.515182	1.03595					0.774926	0.813375	1.07298
						0.3093	0.0829137	0.352276					1.10563	0.819122	0.800554													0.850212	1.29086	1.00293					1.01803	1.10379	0.805442
						0.337456	0.288112	0.290514					1.04544	0.853721	0.699875													0.807291	0.664801	1.23827					0.927906	1.45872	1.25769
						0.31515	0.0691209	0.334287					0.999688	0.868778	1.18802													1.02184	0.462152	1.21345					1.0019	1.69178	1.19293
						0.397707	0.121104	0.269125					1.07818	0.77044	0.835193													0.991543	0.354909	0.591848					1.50093	2.9619	1.67218
						0.35225	0.163315	0.239805					0.932749	1.02734	1.0827													1.12507	0.359834	0.581583					1.13616	3.88411	1.30745
						0.338373	0.11792	0.360607					0.940977	0.739468	0.878296													1.13855	0.377733	1.2121					1.00059	1.85898	0.973607
						0.326971	0.204633	0.371838					1.05313	1.1352	0.793611													0.954457	0.416783	0.980513					1.04806	2.10399	1.63741
						0.423223	0.164752	0.309137					1.20945	0.871197	0.807497														1.21512							1.08003
						0.35329	0.132906	0.436511					1.05186	1.04334	1.04494
						0.271982	0.16175	0.510816					0.950531	1.03518	1.27231
						0.471761	0.128604	0.324304					1.28535	1.19613	1.47663
						0.236934	0.0765962	0.310325					0.851645	0.714542	1.07891
						0.363143	0.137063	0.241638					0.868418	1.12362	0.77832
SDS-PAGE (GAPDH and NINJ1)						0.216049	0.129712	0.170234					0.71258	0.991145	0.739663
						0.319155	0.262366	0.358889					0.821231	1.32059	1.02586
						0.45736	0.0684754	0.216843					1.22118	0.960403	1.05334
						0.412315	0.117886	0.140914					1.24252	1.30409	0.773514
						0.18645	0.131365	0.161853					0.780042	1.17458	0.981051
							0.0891412	0.151854						1.063	1.10149
							0.182079	0.246267						1.36566	1.52458
							0.135022	0.116277						1.24597	0.82707
							0.0868197	0.41209						1.06221	1.30589
							0.163919	0.425502						1.39968	1.08259
							0.144277	0.140077						1.39697	1.09628
							0.15946	0.197369						1.50732	0.930042
							0.0977943	0.290089						1.32872	1.4078
							0.203404	0.147044						1.27166	0.977654
							0.169388	0.234808						1.22611	1.13593
							0.133382	0.316632						1.23769	1.11555
							0.123636	0.290463						1.27293	1.33758
							0.130781	0.285062						1.40271	0.813694
							0.156693	0.208727						1.63832	1.03068
							0.128122	0.219722						1.71821	1.21141
								0.204414							0.856953
								0.16377							0.90207
								0.254882							1.01852
