# Supplementary material for: Glycine inhibits NINJ1 membrane clustering to suppress plasma membrane rupture in cell death
Source: eLife. 2022 Dec 5;11:e78609. doi: 10.7554/eLife.78609 (PMC9754625; doi:10.7554/eLife.78609)
Supplement: Figure 4—figure supplement 2—source data 1. [file elife-78609-fig4-figsupp2-data1.xlsx]

## Sheet: Figure 4 - Figure suppl 2
Figure 4 - Figure Supplement 2
A) siNinj1						B) Native and SDS PAGE							C ) LDH release
NINJ1 signal intensity relative to B-actin						Native PAGE (NINJ1)							Average LDH measurements from triplicate wells per condition and experiment
	NINJ1:	B-actin:	NINJ1/B-actin:	siCTR = 1:										exp1	exp2	exp3
siNINJ1 - Untreated	0.323	57.5	0.00561739	0.252783									LPS + N	100	100	100
siCTR - Untreated	1.16	52.2	0.0222222	1									LPS + N + Glycine	11.3831	4.96311	22.4299
B-actin:
siNINJ1 -untreated = 1, siCTR = 5
													D) IL-1b release
													OD values at 450 nm:
														No Inhibition			Glycin
NINJ1:						SDS PAGE (beta-actin)							Experiment	1	2	3	1	2	3
siNINJ1 untreated = 7, siCTR untreated = 3													Medium	0.046	0.046	0.045	0.041	0.042	0.039
													LPS+Ng	0.296	0.302	0.323	0.312	0.296	0.319
