# Supplementary material for: Glycine inhibits NINJ1 membrane clustering to suppress plasma membrane rupture in cell death
Source: eLife. 2022 Dec 5;11:e78609. doi: 10.7554/eLife.78609 (PMC9754625; doi:10.7554/eLife.78609)
Supplement: Figure 4—source data 1. [file elife-78609-fig4-data1.xlsx]

## Sheet: Figure 4
Figure 4
Figure 4A -- Native-PAGE and SDS						Figure 4C-D -- NINJ1 Puncta Density and intensity
Native PAGE (NINJ1)						Density								Intensity
						Yellow: Cells shown in figure.	Donor 1
							Image file	Cell mask	Maxima	Area in micron^2	Puncta/micron^2	Mean puncta/micron^2		Mean of intensities in middle of maximas	Mean of mean values
						LPS	E2-1	Cell 2	186	483.496	0.384698	0.382161		3334.82	3455.76
							E2-2	Cell 1	1123	2530.19	0.443841			3890.21
							E2-3	Cell 1	171	537.828	0.317946			3142.26
							Image file	Cell mask	Maxima	Area in micron^2	Puncta/micron^2	Mean puncta/micron^2		Mean of intensities in middle of maximas	Mean of mean values
						LPS + N	D2-5	Cell 1	256	742.212	0.344915	0.27397		2429.27	4459.15
							D2-6	Cell 1	237	1198.71	0.197712			5964.89
							D2-8-2	Cell 1	262	938.122	0.279281			4983.31
SDS PAGE (Beta-actin)							Image file	Cell mask	Maxima	Area in micron^2	Puncta/micron^2	Mean puncta/micron^2		Mean of intensities in middle of maximas	Mean of mean values
						LPS + N + glycine	C2-3	Cell 1	281	1050.58	0.267472	0.287103		2562.4	3379.15
							C2-5	Cell 1	489	1610.12	0.303704			2544.82
							C2-10	Cell 1	317	1092.6	0.290133			5030.21
							Donor 2
							Image file	Cell mask	Maxima	Area in micron^2	Puncta/micron^2	Mean puncta/micron^2		Mean of intensities in middle of maximas	Mean of mean values
						LPS	E3-1	Cell 1	634	2123.76	0.298527	0.278048		3348.37	5816.99
							E3-2	Cell 1	427	1110.66	0.384457			4076.28
							E3-3	Cell 1	93	615.238	0.151161			10026.3
							Image file	Cell mask	Maxima	Area in micron^2	Puncta/micron^2	Mean puncta/micron^2		Mean of intensities in middle of maximas	Mean of mean values
						LPS + N	D3-2	Cell 1	528	3335.63	0.158291	0.196283		6277.74	4203.63
							D3-3	Cell 1	455	1625.58	0.279901			2892.04
							D3-4	Cell 1	191	1267.78	0.150657			3441.12
							Image file	Cell mask	Maxima	Area in micron^2	Puncta/micron^2	Mean puncta/micron^2		Mean of intensities in middle of maximas	Mean of mean values
						LPS + N + glycine	C3-1	Cell 1	584	1461.81	0.399504	0.295823		3576.01	4964.05
							C3-3	Cell 1	149	691.797	0.215381			7905.85
							C3-4	Cell 1	133	487.924	0.272583			3410.3
							Donor 3
							Image file	Cell mask	Maxima	Area in micron^2	Puncta/micron^2	Mean puncta/micron^2		Mean of intensities in middle of maximas	Mean of mean values
						LPS	E4-1	Cell 1	2923	8248.68	0.35436	0.323196		3553.52	3117.85
							E4-2	Cell 1	2629	7698.68	0.341487			2957.24
							E4-3	Cell 1	504	1841.16	0.273741			2842.78
							Image file	Cell mask	Maxima	Area in micron^2	Puncta/micron^2	Mean puncta/micron^2		Mean of intensities in middle of maximas	Mean of mean values
						LPS + N	D4-1	Cell 1	117	459.14	0.254824	0.299425		2450.67	6393
							D4-2	Cell 1	333	1067.31	0.311999			13969.7
							D4-3	Cell 1	263	793.478	0.331452			2758.64
							Image file	Cell mask	Maxima	Area in micron^2	Puncta/micron^2	Mean puncta/micron^2		Mean of intensities in middle of maximas	Mean of mean values
						LPS + N + glycine	C4-2	Cell 1	795	2122.95	0.374478	0.315554		3576.36	3203.2
							C4-3	Cell 1	682	2229.15	0.305946			3362.74
							C4-4	Cell 1	595	2234.85	0.266237			2670.51
							Donor 4
							Image file	Cell mask	Maxima	Area in micron^2	Puncta/micron^2	Mean puncta/micron^2		Mean of intensities in middle of maximas	Mean of mean values
						LPS	E5-1	Cell 1	747	2143.69	0.348465	0.260345		3507.14	3433.25
							E5-2	Cell 2	374	1484.21	0.251986			2646.97
							E5-5	Cell 1	543	3006.91	0.180584			4145.64
							Image file	Cell mask	Maxima	Area in micron^2	Puncta/micron^2	Mean puncta/micron^2		Mean of intensities in middle of maximas	Mean of mean values
						LPS + N	D5-1-2	Cell 1	624	2307.41	0.270433	0.252262		3285.67	2831.35
							D5-3	Cell 1	839	3171.06	0.26458			2826.53
							D5-4	Cell 1	547	2466.49	0.221773			2381.86
							Image file	Cell mask	Maxima	Area in micron^2	Puncta/micron^2	Mean puncta/micron^2		Mean of intensities in middle of maximas	Mean of mean values
						LPS + N + glycine	C5-1	Cell 2	373	1072.67	0.347729	0.283657		3706.93	3346.89
							C5-2	Cell 1	538	1592.75	0.337781			3818.68
							C5-3	Cell 1	291	1758.72	0.165461			2515.05
