# Supplementary material for: Glycine inhibits NINJ1 membrane clustering to suppress plasma membrane rupture in cell death
Source: eLife. 2022 Dec 5;11:e78609. doi: 10.7554/eLife.78609 (PMC9754625; doi:10.7554/eLife.78609)
Supplement: Figure 5—figure supplement 1—source data 1. [file elife-78609-fig5-figsupp1-data1.xlsx]

## Sheet: Figure 5 - Figure suppl 1
Figure 5 - Figure Supplement 1
Figure 5 - Figure Supplement 1A						Figure 5 - Figure Supplement 1B															Figure 5 - Figure Supplement 1D
NINJ1 Flag							untreated						Dox								Time [h[	Cas9				Clone 1				Clone 2
						Cas9 parental				0.161029	0.056463	0.024217				0.159231	0.098316	0.030273			0	5.6	6.74	4.93	5.6	19.9	14.2	13	20.8	15	9.46	11.7	14.1
						Clone 34		0.283498	0.190191	0.170409	0.10891	0.05734		0.956356	0.95122	0.811809	0.81274	0.801645			3	5.97	4.65	3.34	4.69	29.7	20.1	20.6	30	38.2	12.3	19	35
						Clone 37			0.132044	0.206258	0.064537	0.05922			0.70319	0.494808	0.571955	0.96271			6	4.16	4.37	3.79	4.78	90.5	87.8	69.7	88	94.3	79.5	56.5	83.1
																					9	4.17	4.31	2.73	5.08	97.8	97.8	88.9	93.9	99.2	93.1	87.8	93.5
																					12	5.39	4.81	3.05	4.83	99.5	94.9	85.6	95.8	99.4	96.2	87.4	77.8
						Figure 5 - Figure Supplement 1C
																					Figure 5 - Figure Supplement 1E
						Time [s]	Clone 1	Clone 1 + Dox	Cas9	Cas9 +Dox	Clone 2	Clone 2 + Dox
						0	0.0863939	0.0843794	0.107148	0.0860469	0.15252	0.18346									Time [h[	Cas9				Clone 1				Clone 2
						0.0833333	0.106216	0.0961526	0.12206	0.116501	0.158943	0.191603									0	32.7	169	128.1	139.4	112.8	395	337.8	369.3	64.2	270.1	241.4	248.4
						0.166667	0.10699	0.101903	0.116934	0.105958	0.15855	0.196379									3	37.2	145	87.1	111.4	144.8	607	527.8	558.3	161.9	391.1	417.4	720.4
						0.25	0.118834	0.0934365	0.118225	0.103796	0.145731	0.202315									6	25.2	132	90.1	120.4	2299.8	4371	2409.8	4904.3	1881.8	3100.1	1618.4	3552.4
						0.333333	0.117496	0.107069	0.129874	0.12378	0.172695	0.213453									9	22.4	132	64.6	124.4	8071.8	10401	6637.8	8562.3	4771.4	6104.1	4026.4	6545.4
						0.416667	0.116444	0.103229	0.128861	0.107442	0.159963	0.209811									12	29.8	160	80.1	122.4	9869.8	11173	8911.8	11951.3	5574.4	7361.1	4803.4	5323.4
						0.5	0.1161	0.0953037	0.122322	0.111282	0.160632	0.197668
Actin						0.583333	0.114418	0.103375	0.119145	0.105999	0.162516	0.21238
						0.666667	0.112006	0.0960144	0.117027	0.113109	0.160817	0.202716
						0.75	0.109313	0.0990126	0.115251	0.107945	0.153856	0.199947									Figure 5 - Figure Supplement 1F
						0.833333	0.116762	0.101649	0.12671	0.115209	0.162205	0.206857
						0.916667	0.113292	0.0938403	0.117717	0.101091	0.146595	0.205052
						1	0.106782	0.101873	0.119618	0.106489	0.146983	0.203559									Time [h[	Cas9				Clone 1				Clone 2
						1.08333	0.108997	0.0996905	0.122231	0.107243	0.147646	0.197496									0	6.93	8.15	8.33	5.56	11.4	18	21.2	12.8	7.15	13.5	10.4	9.2
						1.16667	0.101307	0.102565	0.117196	0.104177	0.152106	0.198111									3	6.44	6.15	8	5.47	22.7	33	36.1	28.1	13.2	24.3	16.6	19.8
						1.25	0.109029	0.0982287	0.102232	0.100159	0.140412	0.207448									6	5.78	6.34	7.95	4.95	53.3	59.9	52.9	54.8	25.3	42.8	27.9	34.5
						1.33333	0.114634	0.0996259	0.11554	0.112651	0.16169	0.207783									9	5.86	6.19	6.82	5.27	78.2	79	71.7	70.2	31.1	55.5	38.4	47.5
						1.41667	0.111555	0.103013	0.130926	0.115452	0.158893	0.213541									12	6.59	7.11	7.36	4.79	84	79.4	75.9	77	33.3	48.2	44	47
						1.5	0.105821	0.102983	0.119107	0.106479	0.153716	0.203096
						1.58333	0.122584	0.106535	0.127722	0.120169	0.174521	0.210371
						1.66667	0.111597	0.108792	0.119944	0.105259	0.162485	0.20182
						1.75	0.115801	0.106107	0.116708	0.107814	0.156978	0.193863
						1.83333	0.116393	0.107953	0.122772	0.128223	0.161372	0.216977
						1.91667	0.119545	0.10558	0.134245	0.116948	0.165404	0.206883
						2	0.131674	0.115774	0.129136	0.119718	0.170729	0.210179
						2.08333	0.130035	0.109722	0.125073	0.119669	0.16259	0.214286
						2.16667	0.126374	0.12361	0.125159	0.120058	0.162546	0.215314
						2.25	0.110784	0.103493	0.120608	0.103657	0.151235	0.20547
						2.33333	0.116002	0.117201	0.126753	0.119654	0.158115	0.218684
						2.41667	0.114099	0.107415	0.119672	0.115181	0.156342	0.203435
						2.5	0.12767	0.118931	0.126303	0.113793	0.165257	0.218749
						2.58333	0.124577	0.119628	0.125373	0.11295	0.162978	0.203368
						2.66667	0.123743	0.112326	0.123809	0.114178	0.162174	0.206642
						2.75	0.11966	0.106914	0.128496	0.105944	0.159046	0.189399
						2.83333	0.132183	0.121003	0.127102	0.114089	0.157019	0.205254
						2.91667	0.133456	0.113613	0.132159	0.129002	0.164043	0.212445
						3	0.134844	0.11858	0.132539	0.129054	0.156419	0.217026
						3.08333	0.130697	0.122132	0.128854	0.122424	0.161235	0.213481
						3.16667	0.120771	0.117379	0.131011	0.118637	0.163643	0.204841
						3.25	0.142803	0.119025	0.136397	0.125194	0.170184	0.225548
						3.33333	0.140292	0.127113	0.144293	0.136069	0.174459	0.215179
						3.41667	0.138695	0.107306	0.128599	0.113053	0.163668	0.217484
						3.5	0.137801	0.119018	0.134369	0.114943	0.15404	0.207266
						3.58333	0.141897	0.124548	0.153478	0.118989	0.172949	0.21614
						3.66667	0.139222	0.126613	0.136529	0.123035	0.160996	0.207401
						3.75	0.126441	0.119352	0.128734	0.11604	0.149673	0.199979
						3.83333	0.126909	0.12419	0.128079	0.111396	0.156269	0.203791
						3.91667	0.131357	0.121737	0.129202	0.125402	0.162448	0.21281
						4	0.144266	0.130439	0.134264	0.114974	0.156623	0.22253
						4.08333	0.134847	0.126475	0.130909	0.125067	0.160253	0.205964
						4.16667	0.144759	0.132147	0.134561	0.136353	0.157978	0.219595
						4.25	0.140835	0.131705	0.144289	0.136773	0.160936	0.225485
						4.33333	0.143778	0.147048	0.137548	0.12222	0.161125	0.216115
						4.41667	0.145818	0.140603	0.152708	0.124834	0.163563	0.240171
						4.5	0.142309	0.13352	0.133617	0.120144	0.158292	0.230522
						4.58333	0.140455	0.145385	0.139011	0.135692	0.156234	0.235184
						4.66667	0.148546	0.145186	0.140228	0.132639	0.160545	0.228582
						4.75	0.154195	0.148792	0.148238	0.129405	0.172494	0.228681
						4.83333	0.143309	0.145588	0.130639	0.125591	0.158746	0.233543
						4.91667	0.162505	0.15342	0.138868	0.133208	0.16881	0.23697
						5	0.146414	0.152753	0.126874	0.12434	0.161091	0.249126
						5.08333	0.153287	0.163123	0.138285	0.123699	0.160502	0.241746
						5.16667	0.153223	0.172007	0.129191	0.135588	0.169466	0.257304
						5.25	0.150792	0.169124	0.12688	0.125392	0.154372	0.256691
						5.33333	0.152577	0.167676	0.135567	0.126534	0.164008	0.268898
						5.41667	0.143367	0.167912	0.131037	0.125155	0.162892	0.265968
						5.5	0.150677	0.182618	0.138329	0.11955	0.154661	0.264729
						5.58333	0.148594	0.186077	0.138165	0.124747	0.172233	0.288827
						5.66667	0.153721	0.194553	0.140586	0.132504	0.158109	0.291567
						5.75	0.142404	0.2	0.124543	0.12379	0.161549	0.295321
						5.83333	0.15127	0.199972	0.131166	0.122214	0.157999	0.298645
						5.91667	0.147442	0.226195	0.135521	0.1338	0.151704	0.313704
						6	0.138115	0.215786	0.128801	0.117652	0.15744	0.301174
						6.08333	0.152205	0.23274	0.134201	0.128642	0.168887	0.327164
						6.16667	0.14122	0.237436	0.129903	0.125397	0.159969	0.33066
						6.25	0.147916	0.248638	0.139351	0.121128	0.156363	0.326619
						6.33333	0.149046	0.255852	0.125336	0.118462	0.155179	0.331289
						6.41667	0.14778	0.267762	0.128707	0.121199	0.160797	0.362995
						6.5	0.136659	0.265685	0.119326	0.111251	0.151111	0.357206
						6.58333	0.158884	0.299166	0.139099	0.124053	0.154851	0.361534
						6.66667	0.151795	0.299718	0.137443	0.125441	0.169829	0.388562
						6.75	0.142751	0.309782	0.133388	0.129683	0.150507	0.3952
						6.83333	0.146142	0.330245	0.132973	0.132867	0.165769	0.411768
						6.91667	0.146157	0.341057	0.134878	0.13611	0.170834	0.417045
						7	0.154315	0.369789	0.142286	0.135285	0.168211	0.427661
						7.08333	0.144268	0.373578	0.134713	0.133086	0.158613	0.44501
						7.16667	0.156254	0.398918	0.137666	0.130689	0.155991	0.462135
						7.25	0.158697	0.42733	0.13346	0.132026	0.167636	0.466462
						7.33333	0.153204	0.436256	0.135809	0.125682	0.159743	0.471365
						7.41667	0.15072	0.438803	0.132241	0.12009	0.161821	0.483367
						7.5	0.152929	0.445277	0.133764	0.132953	0.171224	0.507223
						7.58333	0.152394	0.476502	0.122684	0.12812	0.172174	0.510671
						7.66667	0.156634	0.490802	0.124549	0.132065	0.173611	0.520912
						7.75	0.152714	0.507254	0.130688	0.12763	0.170893	0.534477
						7.83333	0.151945	0.53653	0.136505	0.129143	0.171142	0.540539
						7.91667	0.149903	0.529691	0.141593	0.145453	0.16406	0.550591
						8	0.145837	0.546824	0.132715	0.122527	0.154355	0.558853
						8.08333	0.147477	0.563768	0.132165	0.12418	0.172009	0.56233
						8.16667	0.146314	0.580713	0.128751	0.123491	0.168733	0.584172
						8.25	0.143597	0.603259	0.120503	0.122773	0.165183	0.606095
						8.33333	0.143311	0.606211	0.118616	0.115871	0.164331	0.615607
						8.41667	0.145684	0.628476	0.133742	0.129711	0.17776	0.624259
						8.5	0.154657	0.638512	0.12483	0.124724	0.174681	0.622591
						8.58333	0.144171	0.665015	0.128673	0.125821	0.169563	0.644661
						8.66667	0.147011	0.678837	0.132953	0.126353	0.178617	0.655263
						8.75	0.145556	0.691725	0.137355	0.130895	0.168745	0.656407
						8.83333	0.152286	0.703835	0.118356	0.126148	0.178568	0.663355
						8.91667	0.143911	0.708352	0.134562	0.128375	0.17085	0.684476
						9	0.148188	0.726409	0.127117	0.135338	0.184935	0.707616
						9.08333	0.144249	0.7484	0.123246	0.115068	0.179833	0.709047
						9.16667	0.150628	0.742	0.125342	0.119868	0.171017	0.704464
						9.25	0.158691	0.753381	0.123229	0.120269	0.172859	0.705851
						9.33333	0.160174	0.797677	0.130021	0.135796	0.175298	0.725535
						9.41667	0.16488	0.790814	0.136404	0.131798	0.188583	0.744142
						9.5	0.158801	0.805849	0.130265	0.121011	0.174085	0.740101
						9.58333	0.164816	0.81607	0.134214	0.126159	0.183149	0.77212
						9.66667	0.150714	0.829743	0.121996	0.116127	0.180363	0.756908
						9.75	0.159418	0.850773	0.142022	0.12423	0.189446	0.786265
						9.83333	0.151096	0.853479	0.125919	0.122216	0.187391	0.797586
						9.91667	0.157331	0.859166	0.135536	0.126191	0.173432	0.793058
						10	0.164466	0.890341	0.134456	0.13358	0.185005	0.814004
						10.0833	0.154253	0.883589	0.12337	0.11213	0.180492	0.805022
						10.1667	0.158997	0.892558	0.13672	0.125055	0.181656	0.82113
						10.25	0.164143	0.910289	0.131786	0.121544	0.180217	0.820597
						10.3333	0.168775	0.919294	0.138903	0.125696	0.19272	0.857247
						10.4167	0.161297	0.933708	0.130834	0.113826	0.186025	0.856247
						10.5	0.161382	0.925159	0.136254	0.109108	0.183443	0.856026
						10.5833	0.167492	0.929484	0.135534	0.124494	0.192176	0.854705
						10.6667	0.165936	0.940206	0.137317	0.119807	0.188682	0.859079
						10.75	0.159796	0.955334	0.138364	0.12452	0.18414	0.867984
						10.8333	0.16055	0.965316	0.138452	0.128459	0.189079	0.862897
						10.9167	0.16934	0.969552	0.125639	0.114814	0.179611	0.860901
						11	0.163069	0.979906	0.135291	0.118727	0.183655	0.880367
						11.0833	0.167377	0.976047	0.135353	0.124723	0.192627	0.874412
						11.1667	0.172527	0.97537	0.136894	0.130153	0.196157	0.891977
						11.25	0.169782	0.976811	0.132585	0.120213	0.184181	0.891055
						11.3333	0.174226	0.988518	0.130076	0.114259	0.196167	0.904344
						11.4167	0.164461	0.984735	0.131429	0.11502	0.200197	0.894574
						11.5	0.166083	0.99216	0.142876	0.126341	0.199231	0.917632
						11.5833	0.178643	0.999728	0.130973	0.126886	0.206551	0.910206
						11.6667	0.170697	0.988894	0.132632	0.114312	0.190503	0.895762
						11.75	0.178983	0.988906	0.129469	0.121984	0.193867	0.915143
						11.8333	0.174925	1.00736	0.136779	0.116243	0.206991	0.909289
						11.9167	0.179756	1.00011	0.133373	0.11917	0.20038	0.91205
						12	0.178431	0.987051	0.134143	0.129386	0.200441	0.951135
						12.0833	0.180325	0.997441	0.152283	0.119894	0.199955	0.92932
						12.1667	0.174888	1.01012	0.134958	0.122244	0.191947	0.962195
						12.25	0.186694	1.00249	0.145302	0.131849	0.20482	0.959303
						12.3333	0.185178	1.00628	0.14335	0.118755	0.205718	0.958283
						12.4167	0.187589	1.00721	0.138155	0.129072	0.211777	0.994659
						12.5	0.184768	1.00136	0.135268	0.11485	0.212957	0.984032
						12.5833	0.181195	0.99064	0.135092	0.121524	0.205159	0.996069
						12.6667	0.187462	0.967443	0.147707	0.13046	0.205338	0.973387
						12.75	0.178295	0.960386	0.132092	0.132845	0.20845	0.996558
						12.8333	0.191289	0.962167	0.147143	0.125771	0.201148	1.0115
						12.9167	0.179419	0.972739	0.135009	0.116279	0.203563	1.00314
						13	0.189763	0.959989	0.142021	0.12885	0.22132	1.01195
						13.0833	0.190136	0.97129	0.146976	0.136996	0.212381	0.997559
						13.1667	0.191991	0.960804	0.148768	0.143739	0.207415	1.00385
						13.25	0.19218	0.949317	0.143558	0.132616	0.210556	1.01663
						13.3333	0.190912	0.941599	0.143623	0.128511	0.211067	1.00417
						13.4167	0.205272	0.977245	0.139925	0.134805	0.223853	1.01674
						13.5	0.198361	0.940092	0.144584	0.133589	0.214672	1.04817
						13.5833	0.197461	0.958593	0.147206	0.133264	0.216029	1.00957
						13.6667	0.203396	0.966997	0.151518	0.141621	0.217553	1.04122
						13.75	0.213393	0.982512	0.155385	0.140924	0.217267	1.01749
						13.8333	0.2039	0.967556	0.139259	0.142677	0.220554	1.03437
						13.9167	0.209345	0.974659	0.155892	0.145669	0.221905	1.03768
						14	0.207634	0.978738	0.156951	0.143795	0.219358	1.04341
