# Supplementary material for: Glycine inhibits NINJ1 membrane clustering to suppress plasma membrane rupture in cell death
Source: eLife. 2022 Dec 5;11:e78609. doi: 10.7554/eLife.78609 (PMC9754625; doi:10.7554/eLife.78609)
Supplement: Figure 5—figure supplement 2—source data 1. [file elife-78609-fig5-figsupp2-data1.xlsx]

## Sheet: Figure 1  Figure suppl 1
Figure 5 - Figure Supplement 2: Circular dichroism
Figure 5 - Figure Supplement 2A -- Secondary structure						Figure 5 - Figure Supplement 2B -- Glycine titration
	Wavelength (nm)	Ellipticity (mdeg)				Wavelength (nm)	Ellipticity (mdeg)
	260	0.47556					Gly 0	Gly 1.25	Gly 2.5	Gly 5	Gly 10	Gly 20
	259.5	0.446942				260	0.616713	0.264917	0.29147	0.341714	-0.36128	-0.0559881
	259	0.441381				259.5	0.682422	0.286435	0.309109	0.349368	-0.309198	-0.0121368
	258.5	0.479884				259	0.733977	0.283366	0.326051	0.343046	-0.273861	0.0495436
	258	0.526435				258.5	0.779507	0.292761	0.358311	0.348502	-0.256172	0.116582
	257.5	0.53674				258	0.807955	0.287786	0.402068	0.352415	-0.258963	0.17651
	257	0.537553				257.5	0.797001	0.284703	0.455636	0.368155	-0.28116	0.222711
	256.5	0.553746				257	0.736746	0.294001	0.471184	0.408092	-0.317723	0.250868
	256	0.538374				256.5	0.697173	0.346197	0.488655	0.458921	-0.348955	0.242322
	255.5	0.504289				256	0.658918	0.398238	0.471111	0.49075	-0.362738	0.20552
	255	0.484967				255.5	0.638799	0.471827	0.460409	0.545823	-0.332971	0.149085
	254.5	0.510934				255	0.617598	0.51094	0.431091	0.535734	-0.320134	0.0771186
	254	0.515522				254.5	0.603929	0.539535	0.411343	0.492152	-0.319397	0.0127958
	253.5	0.512418				254	0.5926	0.54019	0.433617	0.420364	-0.313212	-0.0077693
	253	0.540283				253.5	0.609725	0.510945	0.507848	0.380063	-0.290104	0.0313708
	252.5	0.555763				253	0.607368	0.481489	0.563212	0.389337	-0.265707	0.133443
	252	0.586554				252.5	0.57512	0.4261	0.558536	0.386217	-0.285034	0.175094
	251.5	0.597994				252	0.524153	0.339415	0.462089	0.366368	-0.340756	0.174707
	251	0.60116				251.5	0.458768	0.238163	0.332298	0.32683	-0.420934	0.122125
	250.5	0.587996				251	0.404358	0.144937	0.202215	0.246016	-0.517559	0.0118545
	250	0.551613				250.5	0.343959	0.086345	0.109156	0.163213	-0.623166	-0.106167
	249.5	0.527435				250	0.321422	0.101298	0.0980824	0.117219	-0.667868	-0.194764
	249	0.453832				249.5	0.348977	0.0922292	0.137833	0.113658	-0.689993	-0.247774
	248.5	0.363225				249	0.361774	0.0950446	0.176968	0.144789	-0.683369	-0.256988
	248	0.332619				248.5	0.319065	0.0322991	0.169162	0.122575	-0.702064	-0.293095
	247.5	0.297683				248	0.26917	-0.033724	0.123937	0.117735	-0.724408	-0.296216
	247	0.284873				247.5	0.2029	-0.092506	0.0399847	0.0973445	-0.771686	-0.32581
	246.5	0.245372				247	0.175188	-0.122907	-0.008863	0.0952305	-0.80132	-0.342796
	246	0.140335				246.5	0.157832	-0.089982	-0.046253	0.112378	-0.852299	-0.368832
	245.5	0.021346				246	0.185116	-0.05062	-0.044954	0.146811	-0.87921	-0.39371
	245	-0.0921				245.5	0.184661	-0.051219	-0.043958	0.142943	-0.944517	-0.426791
	244.5	-0.15045				245	0.128038	-0.119602	-0.060842	0.0876983	-1.01055	-0.462811
	244	-0.1722				244.5	0.0062175	-0.242285	-0.110024	-0.040336	-1.08423	-0.518688
	243.5	-0.1957				244	-0.132575	-0.393272	-0.187377	-0.182549	-1.15364	-0.594432
	243	-0.24533				243.5	-0.291891	-0.549821	-0.3132	-0.346999	-1.24765	-0.721821
	242.5	-0.36608				243	-0.462881	-0.693299	-0.442001	-0.507469	-1.35178	-0.852669
	242	-0.60512				242.5	-0.630766	-0.790594	-0.583132	-0.676211	-1.47944	-1.01606
	241.5	-0.85494				242	-0.798258	-0.916714	-0.700092	-0.828223	-1.6151	-1.18156
	241	-1.09754				241.5	-1.00118	-1.07218	-0.893497	-1.00938	-1.80002	-1.36426
	240.5	-1.27239				241	-1.2151	-1.29934	-1.14263	-1.20041	-2.01	-1.55187
	240	-1.44661				240.5	-1.40251	-1.52719	-1.43511	-1.41866	-2.24612	-1.75727
	239.5	-1.66127				240	-1.56546	-1.76487	-1.70844	-1.64973	-2.47889	-1.97764
	239	-1.9499				239.5	-1.7365	-1.99384	-1.96146	-1.88696	-2.72782	-2.20924
	238.5	-2.23482				239	-1.92583	-2.21447	-2.15229	-2.12317	-2.97152	-2.44267
	238	-2.55859				238.5	-2.15733	-2.42074	-2.33799	-2.37674	-3.22906	-2.72086
	237.5	-2.8746				238	-2.49147	-2.71347	-2.57172	-2.66805	-3.5472	-3.05778
	237	-3.2202				237.5	-2.88565	-3.1059	-2.93403	-3.02425	-3.93965	-3.44667
	236.5	-3.5719				237	-3.30328	-3.54245	-3.3471	-3.40745	-4.36313	-3.86014
	236	-3.99175				236.5	-3.6707	-3.96392	-3.78826	-3.79828	-4.77231	-4.28347
	235.5	-4.47397				236	-4.01992	-4.34714	-4.19833	-4.19578	-5.15198	-4.70537
	235	-4.95595				235.5	-4.34005	-4.68219	-4.57456	-4.57977	-5.51475	-5.10954
	234.5	-5.38679				235	-4.63686	-5.0218	-4.89221	-4.94891	-5.89459	-5.51461
	234	-5.85545				234.5	-4.96052	-5.38834	-5.21426	-5.34548	-6.32575	-5.95616
	233.5	-6.33254				234	-5.38645	-5.8681	-5.59845	-5.8213	-6.85909	-6.44787
	233	-6.872				233.5	-5.86491	-6.43582	-6.05799	-6.38077	-7.46155	-6.96709
	232.5	-7.51362				233	-6.39364	-7.02505	-6.56658	-6.96081	-8.08239	-7.49349
	232	-8.16502				232.5	-6.92395	-7.61129	-7.08182	-7.51231	-8.67598	-8.02063
	231.5	-8.71847				232	-7.47234	-8.17799	-7.65979	-8.0655	-9.261	-8.5802
	231	-9.25343				231.5	-7.99474	-8.67678	-8.26406	-8.59089	-9.84406	-9.1349
	230.5	-9.76443				231	-8.48899	-9.13524	-8.83419	-9.09364	-10.4024	-9.67681
	230	-10.3031				230.5	-8.97678	-9.58829	-9.35822	-9.5843	-10.9291	-10.2224
	229.5	-10.8445				230	-9.4981	-10.0892	-9.86972	-10.0795	-11.4715	-10.7824
	229	-11.3569				229.5	-10.0264	-10.688	-10.4011	-10.607	-12.0236	-11.3805
	228.5	-11.9533				229	-10.5501	-11.3176	-10.9396	-11.1856	-12.6007	-11.9979
	228	-12.5322				228.5	-11.0555	-11.9561	-11.4271	-11.7615	-13.1719	-12.6062
	227.5	-13.0371				228	-11.5378	-12.5466	-11.9417	-12.3336	-13.7426	-13.1787
	227	-13.5997				227.5	-11.9716	-13.028	-12.4118	-12.8516	-14.2708	-13.696
	226.5	-14.1283				227	-12.3783	-13.431	-12.8497	-13.3342	-14.7009	-14.1614
	226	-14.6359				226.5	-12.7938	-13.7696	-13.2169	-13.7565	-15.0523	-14.553
	225.5	-15.0681				226	-13.2254	-14.1155	-13.5755	-14.1267	-15.3946	-14.9487
	225	-15.4061				225.5	-13.6628	-14.5459	-13.9347	-14.5214	-15.7649	-15.3594
	224.5	-15.7787				225	-14.0758	-14.9843	-14.3102	-14.9701	-16.2152	-15.7935
	224	-16.1465				224.5	-14.4267	-15.3734	-14.6549	-15.4067	-16.6271	-16.197
	223.5	-16.3961				224	-14.7021	-15.6808	-14.9333	-15.7549	-17.0046	-16.5501
	223	-16.5644				223.5	-14.895	-15.8704	-15.1504	-15.9627	-17.2722	-16.8877
	222.5	-16.6125				223	-14.9998	-15.9956	-15.3382	-16.0494	-17.452	-17.1083
	222	-16.5571				222.5	-15.0782	-16.0816	-15.4245	-16.07	-17.5352	-17.2177
	221.5	-16.5511				222	-15.1468	-16.1821	-15.5016	-16.0982	-17.6126	-17.2647
	221	-16.5948				221.5	-15.2055	-16.3041	-15.557	-16.1899	-17.7459	-17.2452
	220.5	-16.7004				221	-15.2954	-16.3807	-15.6603	-16.3361	-17.9163	-17.2336
	220	-16.8288				220.5	-15.3895	-16.4186	-15.7853	-16.4596	-18.0551	-17.2322
	219.5	-16.8717				220	-15.4976	-16.4179	-15.8973	-16.567	-18.1303	-17.2704
	219	-16.9685				219.5	-15.5583	-16.3455	-15.9777	-16.529	-18.0606	-17.3833
	218.5	-16.9559				219	-15.5608	-16.3235	-15.9812	-16.436	-17.975	-17.5117
	218	-16.8357				218.5	-15.5542	-16.3059	-15.8631	-16.2856	-17.8562	-17.677
	217.5	-16.8471				218	-15.5304	-16.3677	-15.6812	-16.214	-17.7685	-17.714
	217	-16.9062				217.5	-15.5022	-16.4736	-15.5079	-16.2112	-17.7539	-17.7608
	216.5	-17.0154				217	-15.4966	-16.5813	-15.3963	-16.2395	-17.763	-17.686
	216	-17.0492				216.5	-15.4845	-16.6504	-15.3995	-16.2161	-17.7944	-17.5949
	215.5	-17.0616				216	-15.4887	-16.7381	-15.5065	-16.2549	-17.8654	-17.4222
	215	-17.1264				215.5	-15.3837	-16.7435	-15.7027	-16.1991	-17.8703	-17.2819
	214.5	-17.0858				215	-15.2575	-16.7456	-15.9679	-16.2148	-17.8686	-17.1503
	214	-17.1021				214.5	-15.2444	-16.715	-16.3221	-16.2363	-17.9838	-17.1563
	213.5	-17.0495				214	-15.27	-16.7621	-16.7557	-16.4329	-18.1708	-17.2662
	213	-17.3111				213.5	-15.4044	-16.8797	-17.1568	-16.6967	-18.4529	-17.6241
	212.5	-17.8433				213	-15.6909	-17.1343	-17.3583	-17.0118	-18.8125	-18.0478
	212	-18.2022				212.5	-16.0455	-17.4546	-17.44	-17.3313	-19.2163	-18.6221
	211.5	-18.6957				212	-16.5716	-17.9185	-17.3456	-17.7135	-19.6721	-19.1279
	211	-19.3358				211.5	-17.1691	-18.4742	-17.3721	-18.1027	-20.0444	-19.6458
	210.5	-20.0511				211	-17.891	-18.9612	-17.5566	-18.6858	-20.4546	-20.1419
	210	-20.8418				210.5	-18.7035	-19.48	-18.0159	-19.5352	-20.9571	-20.7676
	209.5	-21.4052				210	-19.4529	-20.0622	-18.786	-20.5885	-21.5605	-21.5681
	209	-22.2565				209.5	-20.2181	-20.6879	-19.5839	-21.6753	-22.2869	-22.5521
	208.5	-22.945				209	-20.97	-21.4406	-20.3453	-22.5905	-23.1248	-23.5067
	208	-23.575				208.5	-21.679	-22.1689	-21.0382	-23.3765	-23.8403	-24.2149
	207.5	-24.1996				208	-22.2212	-22.9448	-21.6961	-23.9286	-24.4118	-24.6274
	207	-24.5035				207.5	-22.4141	-23.671	-22.3356	-24.3204	-24.8825	-24.6981
	206.5	-24.8166				207	-22.2976	-24.0583	-22.9578	-24.6619	-25.2799	-24.5761
	206	-24.764				206.5	-22.1736	-23.997	-23.2919	-24.9102	-25.4085	-24.1663
	205.5	-24.4934				206	-22.1259	-23.6424	-23.431	-24.9608	-25.2757	-23.9521
	205	-24.1061				205.5	-22.1724	-23.1468	-23.1762	-24.6788	-25.0574	-23.8115
	204.5	-23.2376				205	-22.127	-22.4801	-22.8144	-23.9195	-24.8657	-23.6984
	204	-22.4702				204.5	-21.9135	-21.8535	-22.1694	-22.8622	-24.4383	-23.315
	203.5	-21.3565				204	-21.1566	-21.2745	-21.3915	-21.3304	-23.809	-22.8162
	203	-19.6894				203.5	-19.7163	-20.543	-20.2574	-19.6546	-23.1411	-21.9199
	202.5	-18.1199				203	-17.9782	-19.5309	-19.0287	-18.0363	-22.2047	-20.933
	202	-16.3291				202.5	-16.2977	-18.0545	-17.4965	-16.8975	-21.1729	-19.4792
	201.5	-14.3323				202	-14.7605	-16.3529	-15.8324	-15.7809	-19.7818	-17.9227
	201	-12.1841				201.5	-13.1334	-14.4652	-14.044	-14.2937	-17.9441	-15.9508
	200.5	-9.74769				201	-11.1584	-12.4127	-12.134	-12.2852	-15.8367	-13.7801
	200	-7.20718				200.5	-8.72932	-10.4369	-9.92565	-9.71805	-12.9902	-11.2783
	199.5	-4.19894				200	-5.68937	-8.12134	-7.14445	-6.62091	-10.1881	-8.64221
	199	-1.34049				199.5	-2.44719	-5.42556	-3.98051	-3.30289	-7.40686	-5.9571
	198.5	1.86727				199	0.913686	-2.61808	-0.625256	-0.342936	-4.49509	-3.07625
	198	4.8527				198.5	3.86046	0.332848	2.89054	2.79782	-1.05566	0.270403
	197.5	8.41035				198	6.41778	3.05817	6.08308	5.85301	3.21447	3.49274
	197	11.5584				197.5	8.555	6.03967	9.16746	8.76575	7.68438	6.78968
	196.5	14.8523				197	11.0477	9.25457	12.2393	11.2147	11.688	9.93093
	196	18.5983				196.5	13.5481	13.1783	15.2876	12.8425	15.1172	13.3325
	195.5	21.1075				196	15.522	17.219	18.0826	13.498	17.5252	15.3624
	195	22.0011				195.5	16.0182	20.1485	19.5612	13.66	18.1726	14.999
	194.5	20.6454				195	16.3094	20.6223	18.3855	13.5054	16.6204	12.2639
	194	17.9984				194.5	15.7829	18.2237	15.0174	13.263	14.0838	8.76027
	193.5	14.1863				194	14.8031	14.5567	10.6627	12.0962	10.7307	5.15823
	193	9.95051				193.5	12.6288	10.9515	7.02337	9.36896	8.32427	1.66251
	192.5	5.36709				193	11.1265	8.34477	4.3714	5.45588	5.34197	-1.10321
	192	0.671783				192.5	9.61951	5.96055	3.91322	1.78007	2.80401	-2.74477
	191.5	-2.78044				192	7.01979	2.99768	4.55257	-2.04157	1.208	-3.46717
	191	-4.39151				191.5	2.72806	0.147971	4.84623	-5.24367	-0.838392	-4.74063
	190.5	-5.29863				191	-1.37991	-2.98815	3.65287	-7.42366	-3.39404	-6.50963
	190	-4.23537				190.5	-5.15989	-6.09461	1.72704	-8.97477	-5.83325	-7.33247
						190	-8.20758	-7.48891	0.0042408	-9.92443	-7.7984	-7.3934
