# Supplementary material for: Glycine inhibits NINJ1 membrane clustering to suppress plasma membrane rupture in cell death
Source: eLife. 2022 Dec 5;11:e78609. doi: 10.7554/eLife.78609 (PMC9754625; doi:10.7554/eLife.78609)
Supplement: Figure 5—source data 1. [file elife-78609-fig5-data1.xlsx]

## Sheet: Figure 5
Figure 5
Figure 5A - LPS+N induced GSDMD cleavage in iBMDMs +/- 5 mM Glycine						Figure 5B - LPS+N induced IL-1b release from iBMDMs +/- 5mM Glycine						Figure 5C - doxycyclin-induced expression of NINJ1-FLAG: LDH release and surface expression										Figure 5D - doxycyclin-induced expression of GSDMD-NT BFP: LDH release and surface expression																Figure 5E - Transient transfection of HA-NINJ1: native-PAGE					Figure 5F - Liposomal cargo release assay
Cells: iBMDMs						Cells: iBMDMs		IL1beta release in ng/ml				Cells: iBMDMs expressing doxycyclin-induced NINJ1-FLAG										Cells: iBMDMs expressing doxycyclin-induced, BFP tagged N-terminal fragment of GSDMD																Cells: HeLa cells transiently transfected with HA-mNINJ1					%liposome rupture
anti-beta-actin
							Untreated	LPS	LPS + Nigericin	LPS + Nigericin + Glycine		LDH release normalised to lysis control from duplicate wells per condition:										LDH release normalised to lysis control from duplicate wells per condition:																					Experiment	Vehicle	Scramble	NINJ1 a-helix	NINJ1 a-helix+glycine	candidalysin
						Repeat 1	0.031547	0.02479	11.7966	12.4051			-				Doxycyclin						-							Doxycyclin													1	0	13.5	48.35	96.4	70.45
						Repeat 2	0.001306	0.008917	14.6945	12.4542		Glycine (mM)	Exp 1	Exp 2	Exp 3	Exp 4	Exp 1	Exp 2	Exp 3	Exp 4		Glycine (mM)	Exp 1	Exp 2	Exp 3	Exp 4	Exp 5	Exp 6	Exp 7	Exp 1	Exp 2	Exp 3	Exp 4	Exp 5	Exp 6	Exp 7							2	0	29	84.2	55.6	100.7
						Repeat 3	0	0.006229	9.92938	8.88959		0	12.5509	25.2468	13.7902	14.2208	81.0211	83.6973	79.7356	74.0866		0	12.3796	6.27442	3.96946	3.4583	7.28046	23.7121	7.53543	70.3334	34.5894	31.8405	34.0513	43.2398	82.6542	42.8082							3	0		65.4	39.3	82.11
												5	9.90715	20.4396	9.33757	9.828	60.2286	49.3915	50.3274	64.2953		5	9.01872	4.39816	2.23616	3.21445	4.98053	19.9711	5.69735	46.4348	23.8528	23.1604	24.0901	29.2306	55.92	33.4995							4	0		36.5	53.5	116.2
												25	8.55091	19.1922	8.9446	9.43997	48.3267	40.9736	47.0778	59.4069		25	9.75487	3.70101	1.41945	4.17994	7.71848	19.4047	5.71867	36.0769	20.8809	19.2226	21.5959	28.2703	52.6368	25.4633							5	0		50		103.7
												50	8.99701	18.9778	8.26446	9.22859	35.8928	30.4714	31.1504	40.5519		50	7.63026	3.32391	1.20903	4.83239	6.36415	19.4487		26.9953	19.0768	18.0467	17.2088	25.8594	48.3993
												Surface expression of NINJ1: flow cytometry of anti-FLAG APC										Surface expression of GSDMD NT: flow cytometry of BFP
												Frequency of NINJ1 positive cells										Frequency of GSDMD NT positive cells
													-			Doxycyclin							-		Doxycyclin
anti-GSDMD												Glycine (mM)	Exp 1	Exp 3	Exp 4	Exp 1	Exp 3	Exp 4				Glycine (mM)	Exp 5	Exp6	Exp 5	Exp 6
												0	9.31	8.07	9.18	94.4	92.2	88				0	9.62	7.57	62.2	70.8
												5	11.3	5.94	8.44	93.9	94.7	95.2				5	8.77	8.26	67.4	66.1
												25	12.7	5.77	11.3	95.5	94.5	95.7				25	8.77	7.62	62.8	68.1
												50	16.8	8.5	10.3	91.9	90.7	89.4				50	10	8.14	59.7	64.7													Lane 1	untransfected
																																							Lane 2	HA-NINJ1 transfection
												Mean fluorescence intensity (APC) normalised to dox-induced, untreated										Mean fluorescence intensity (BFP) normalised to dox-induced, untreated																	Lane 3	HA-NINJ1 transfection + glycine
													-			Doxycyclin							-		Doxycyclin
												Glycine (mM)	Exp 1	Exp 3	Exp 4	Exp 1	Exp 3	Exp 4				Glycine (mM)	Exp 5	Exp6	Exp 5	Exp 6
												0	0.03739	0.048	0.05332	1	1	1				0	0.24516	0.16803	1	1
												5	0.05523	0.03303	0.04624	1.11733	1.08571	1.22947				5	0.21311	0.17118	1.08271	0.94651
												25	0.05479	0.03083	0.06234	1.13543	0.94369	1.04984				25	0.21908	0.16551	0.96349	0.95532
												50	0.08935	0.04791	0.05642	0.77289	0.78801	0.69376				50	0.22727	0.17244	0.87556	0.89994
anti- IL1beta (high expoure)
anti- IL1beta (low expoure)
anti-caspase-1
