# Supplementary material for: Glycine inhibits NINJ1 membrane clustering to suppress plasma membrane rupture in cell death
Source: eLife journal article supplement (doi:10.7554/elife.78609), 2022-12-05
Supplement: figures [file elife-78609-figures-v3.pdf]

---

## Figures and figure supplements

Glycine inhibits NINJ1 membrane clustering to suppress plasma membrane rupture in cell death

**Jazlyn P Borges and Ragnhild SR Sætra *et al.***

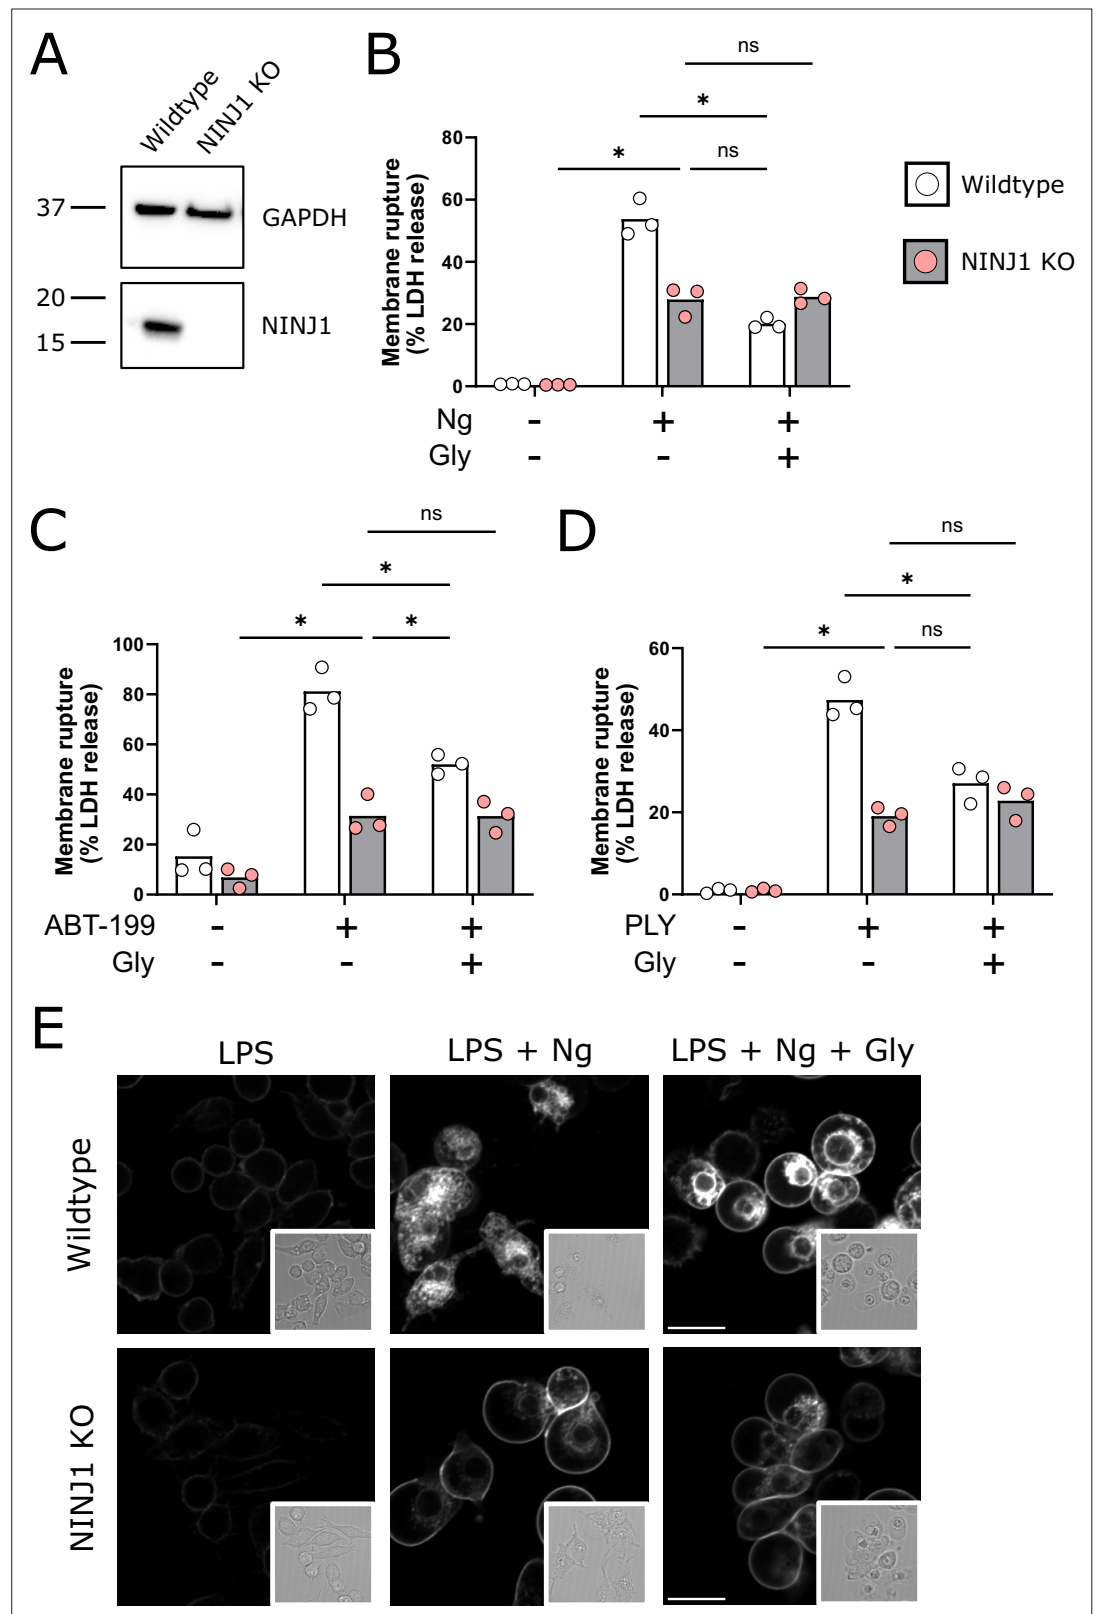

**Figure 1.** NINJ1 knockout functionally and morphologically phenocopies glycine cytoprotection. **(A)** Immunoblot analysis demonstrating NINJ1 knockout in immortalized bone marrow-derived macrophage (iBMDM). GAPDH(glyceraldehyde-3-phosphate dehydrogenase) is presented as a loading control. **(B–D)** Wildtype and NINJ1 knockout iBMDM were induced to undergo pyroptosis (LPS + nigericin), post-apoptosis lysis (secondary

*Figure 1 continued on next page*

*Figure 1 continued*

necrosis; venetoclax, ABT-199), or necrosis (pneumolysin) with or without 5 mM glycine treatment. Cytotoxicity was evaluated by measuring the levels of LDH in the supernatant. Cytotoxicity decreased in glycine-treated wildtype cells comparably to NINJ1 knockout across each of **(B)** pyroptosis, **(C)** post-apoptosis lysis, and **(D)** necrosis. Glycine treatment of NINJ1 KO cells provided no additional protection to knockout cells treated without glycine. Data are expressed as supernatant LDH as a % of total LDH from lysates and supernatants, from  $n = 3$  independent experiments for each cell death type. Individual data points are shown along with their mean. \*  $p < 0.05$  by ANOVA with Tukey's multiple comparison correction. **(E)** LPS-primed wildtype iBMDM induced to undergo pyroptosis in the presence of glycine demonstrate similar plasma membrane ballooning to NINJ1 knockout iBMDM induced to undergo pyroptosis. Membrane ballooning is shown in live cells labeled with the plasma membrane dye FM4-64. The corresponding brightfield image is shown in the inset. Scale bar 15  $\mu\text{m}$ .

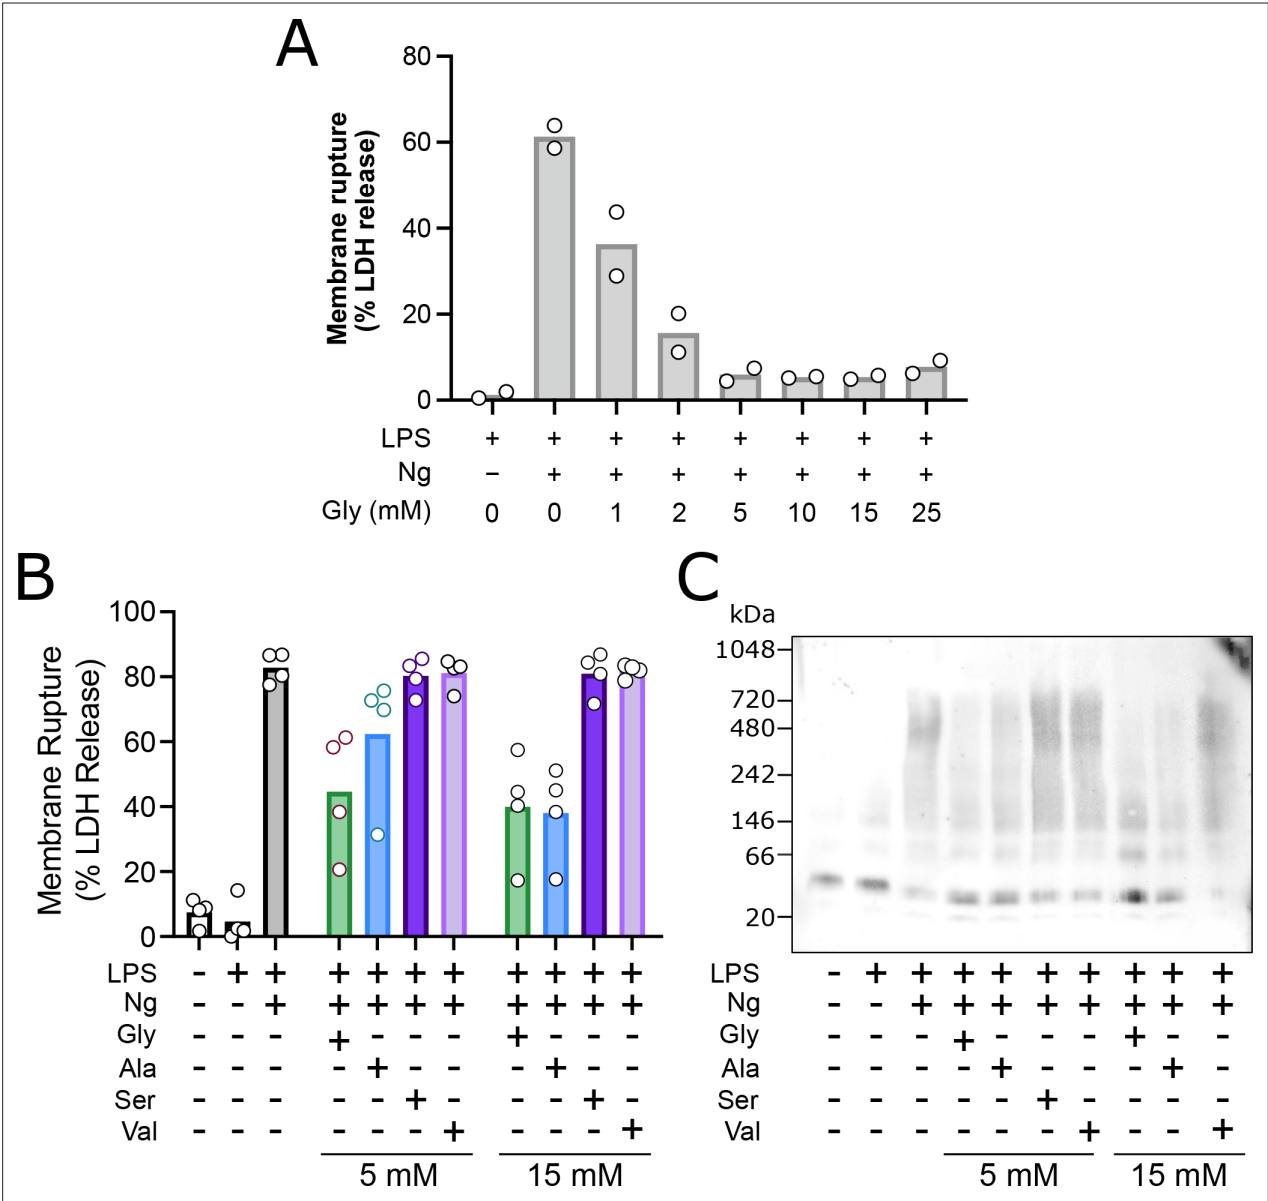

**Figure 1—figure supplement 1.** Glycine dose-dependently inhibits rupture of pyroptotic mouse macrophages with greater potency than structurally similar amino acids through inhibition of NINJ1 clustering. Primary LPS-primed mouse bone marrow-derived macrophage (BMDM) were treated for 90 min with increasing concentrations of glycine or the indicated concentrations of alanine, serine, or valine prior to induction of pyroptosis with nigericin as described in the main text. Supernatant LDH levels were measured 30 min later as a marker of cytotoxicity. **(A)** Glycine dose-dependently inhibits rupture of pyroptotic mouse BMDM with an IC50 between 1 and 2 mM, consistent with the published literature (Loomis et al., 2019). Experiment done in duplicate. **(B)** Glycine confers greater cytoprotection compared with alanine >> serine, valine as measured by LDH release. **(C)** BN-PAGE for NINJ1 shows that amino acid treatment limits NINJ1 aggregation in pyroptosis with a similar hierarchy of glycine > alanine > serine, valine.

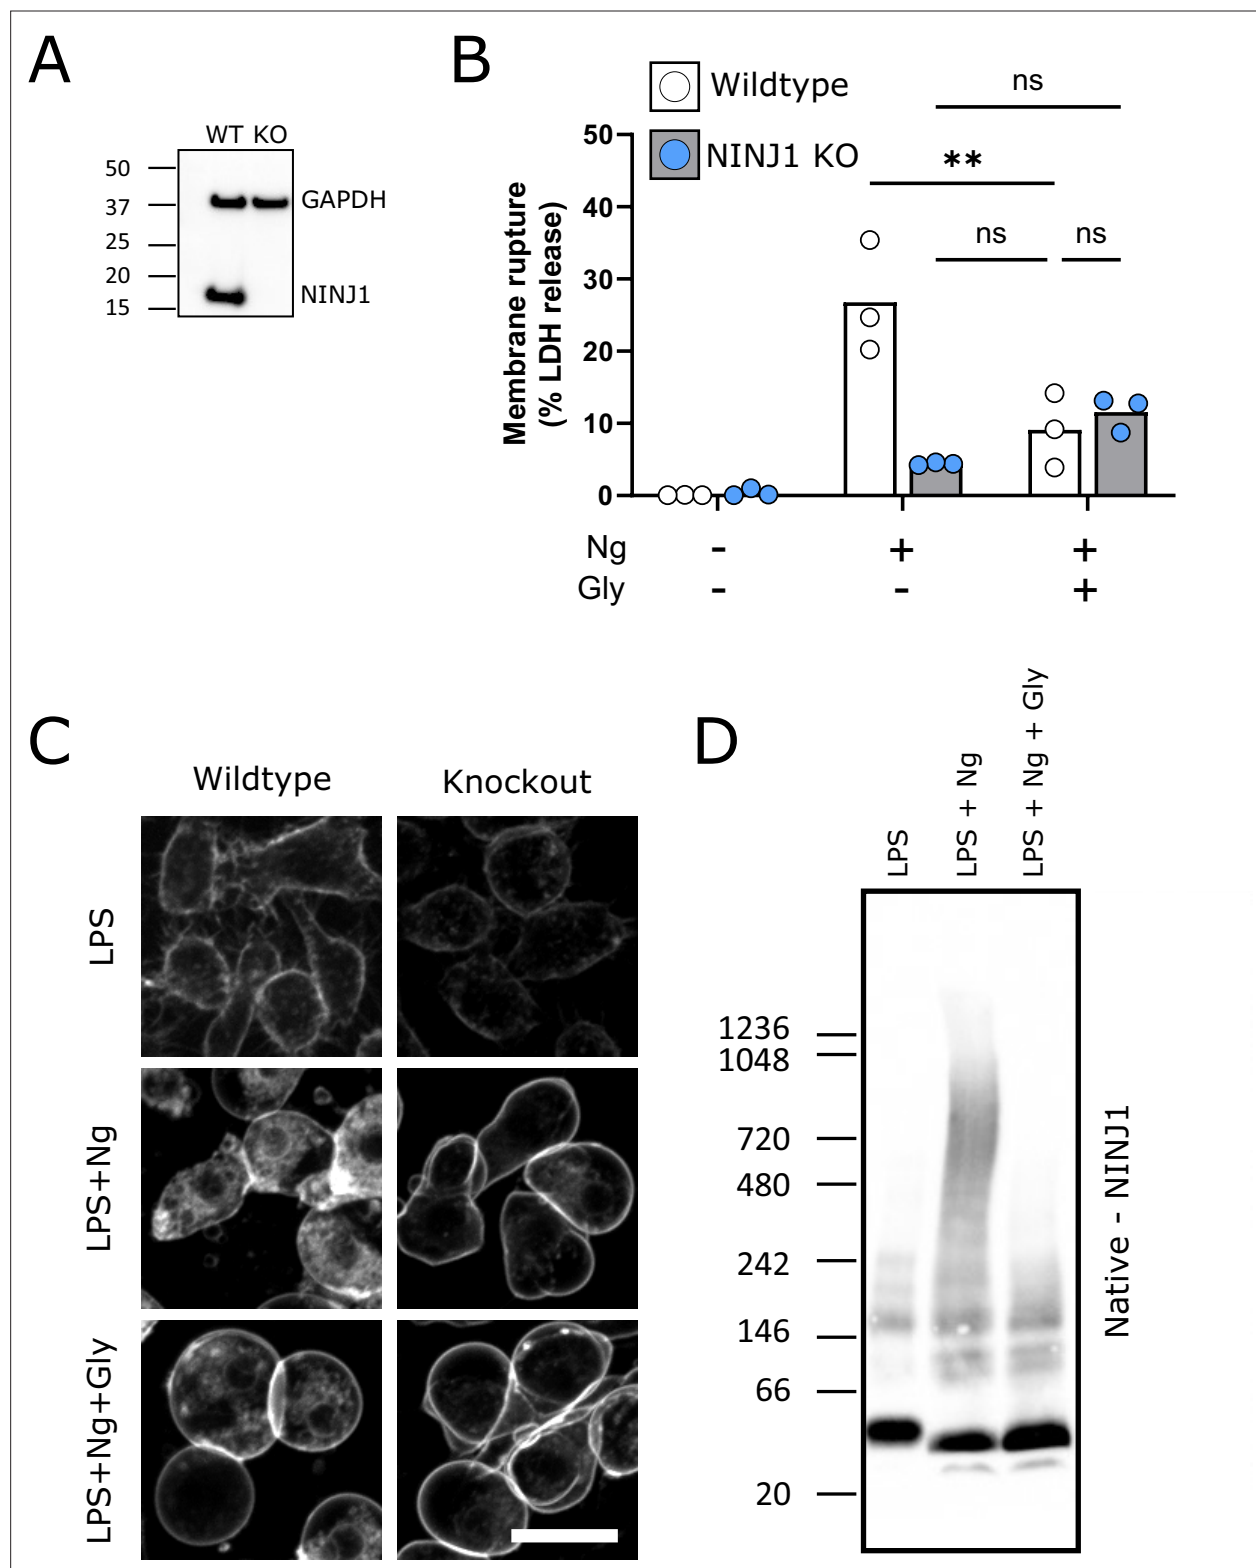

**Figure 1—figure supplement 2.** Glycine cytoprotection phenocopies NINJ1 knockout and prevents NINJ1 aggregation in a mouse macrophage cell line. Using a CRISPR-Cas9 system, *Ninj1* was knocked out of a RAW mouse macrophage cell line engineered to constitutively express ASC (RAW-ASC) and therefore have the capacity to undergo pyroptosis. **(A)** Western blot demonstrating NINJ1 knockout compared with the parental line. GAPDH is shown as a loading control. **(B)** Wildtype and NINJ1 knockout cells were induced to undergo pyroptosis with LPS + nigericin treatment with or without glycine. Supernatant LDH was evaluated as a marker of cytotoxicity by colorimetric assay. Cytotoxicity was decreased in glycine-treated (5 mM) wildtype

Figure 1—figure supplement 2 continued on next page

*Figure 1—figure supplement 2 continued*

cells comparably to NINJ1 knockout. Glycine (5 mM) treatment of NINJ1 KO cells provided no additional protection to knockout cells without glycine. \*  $p < 0.05$  by two-sided ANOVA with Tukey's multiple comparison correction. **(C)** LPS-primed wildtype RAW-ASC induced to undergo pyroptosis in the presence of glycine demonstrate similar plasma membrane ballooning to NINJ1 knockout RAW-ASC cells induced to undergo pyroptosis. Membrane ballooning is shown in live cells labeled with the plasma membrane dye FM4-64. Scale bar 20  $\mu\text{m}$ . **(D)** Native-PAGE analysis of endogenous NINJ1 in RAW-ASC macrophages demonstrates a shift to high molecular weight aggregate upon pyroptosis stimulation, which is abrogated by glycine treatment.

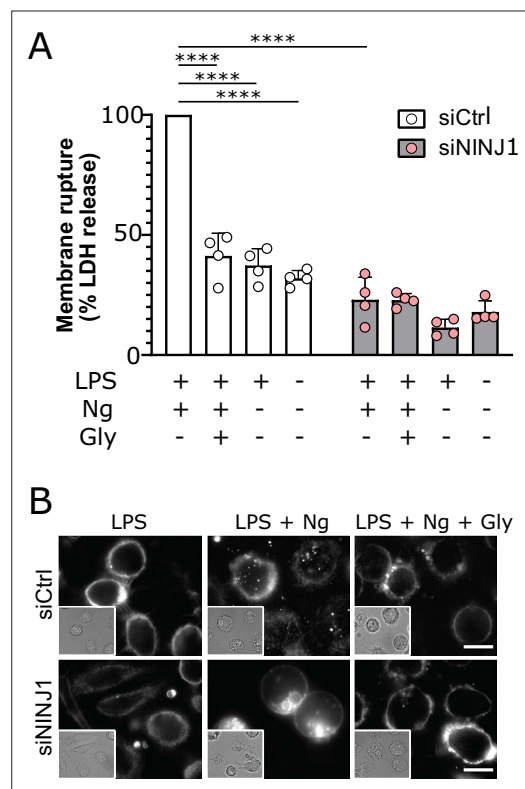

**Figure 2.** NINJ1 silencing in primary human monocyte-derived macrophages (hMDMs) functionally and morphologically phenocopies glycine cytoprotection. Primary hMDMs were treated with siRNA targeting *NINJ1* (siNINJ1) or non-targeted control (siCtrl). **(A)** Wildtype and *NINJ1*-silenced hMDMs were LPS-primed and induced to undergo pyroptosis (nigericin) with or without 50 mM glycine. LDH release in the supernatants was measured to assess cytotoxicity. Cytotoxicity was reduced in glycine-treated wildtype cells, as well as in *NINJ1*-silenced cells. Glycine treatment did not yield additional protection from pyroptotic cell death in *NINJ1*-silenced cells. Data are expressed as % of LDH in supernatant from siCtrl-treated cells stimulated to undergo pyroptosis from  $n=4$  independent donors. Data points from each donor are shown along with their mean and SD. \*\*\*\*  $p<0.0001$  by two-way ANOVA with Tukey's multiple comparison correction. **(B)** Nigericin- and glycine-treated LPS-primed wildtype hMDMs show similar ballooning morphology as nigericin-treated LPS-primed *NINJ1*-silenced hMDMs. Membrane ballooning is shown in live cells labeled with the plasma membrane dye FM1-43. The corresponding brightfield image is shown in the inset. Scale bar 20  $\mu\text{m}$ .

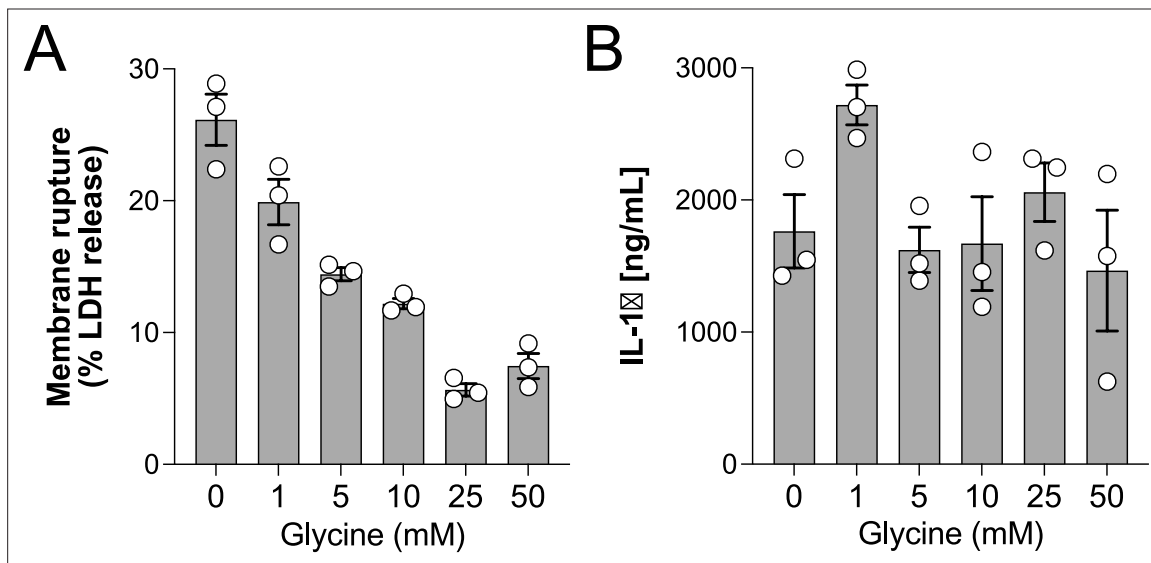

**Figure 2—figure supplement 1.** Glycine dose-dependently inhibits rupture of pyroptotic human monocyte-derived macrophages (hMDMs). Primary human macrophages were pre-incubated with increasing doses of glycine and primed with LPS (1  $\mu$ g/mL) for 3 hr before addition of nigericin (20  $\mu$ M). Levels of LDH and IL-1 $\beta$  in supernatants were measured 2 hr later as described in the main text. Experiment done in triplicate.



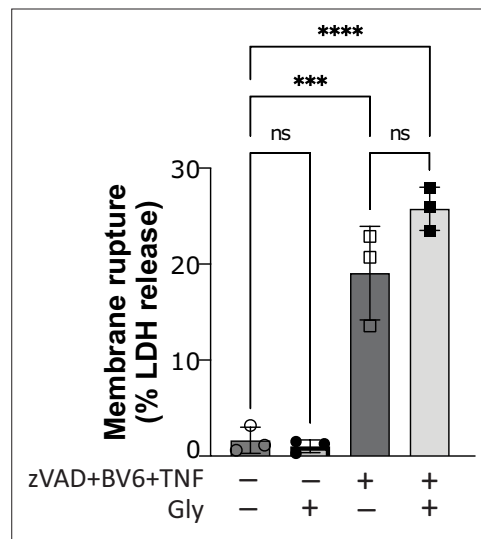

**Figure 2—figure supplement 2.** Glycine does not confer cytoprotection in necroptotic human macrophages. Primary human macrophages pre-treated or not with glycine (50 mM), pan-caspase inhibitor zVAD (25  $\mu$ M), and SMAC mimetic BV6 (10  $\mu$ M) for 30 min before stimulation with TNF (10 ng/mL). Supernatant LDH levels were measured 4 hr later as a measure of cytotoxicity. \*\*\*\*  $p < 0.0001$ , \*\*\*  $p < 0.001$  by two-way ANOVA with Tukey's multiple comparison correction. ns = not significant.

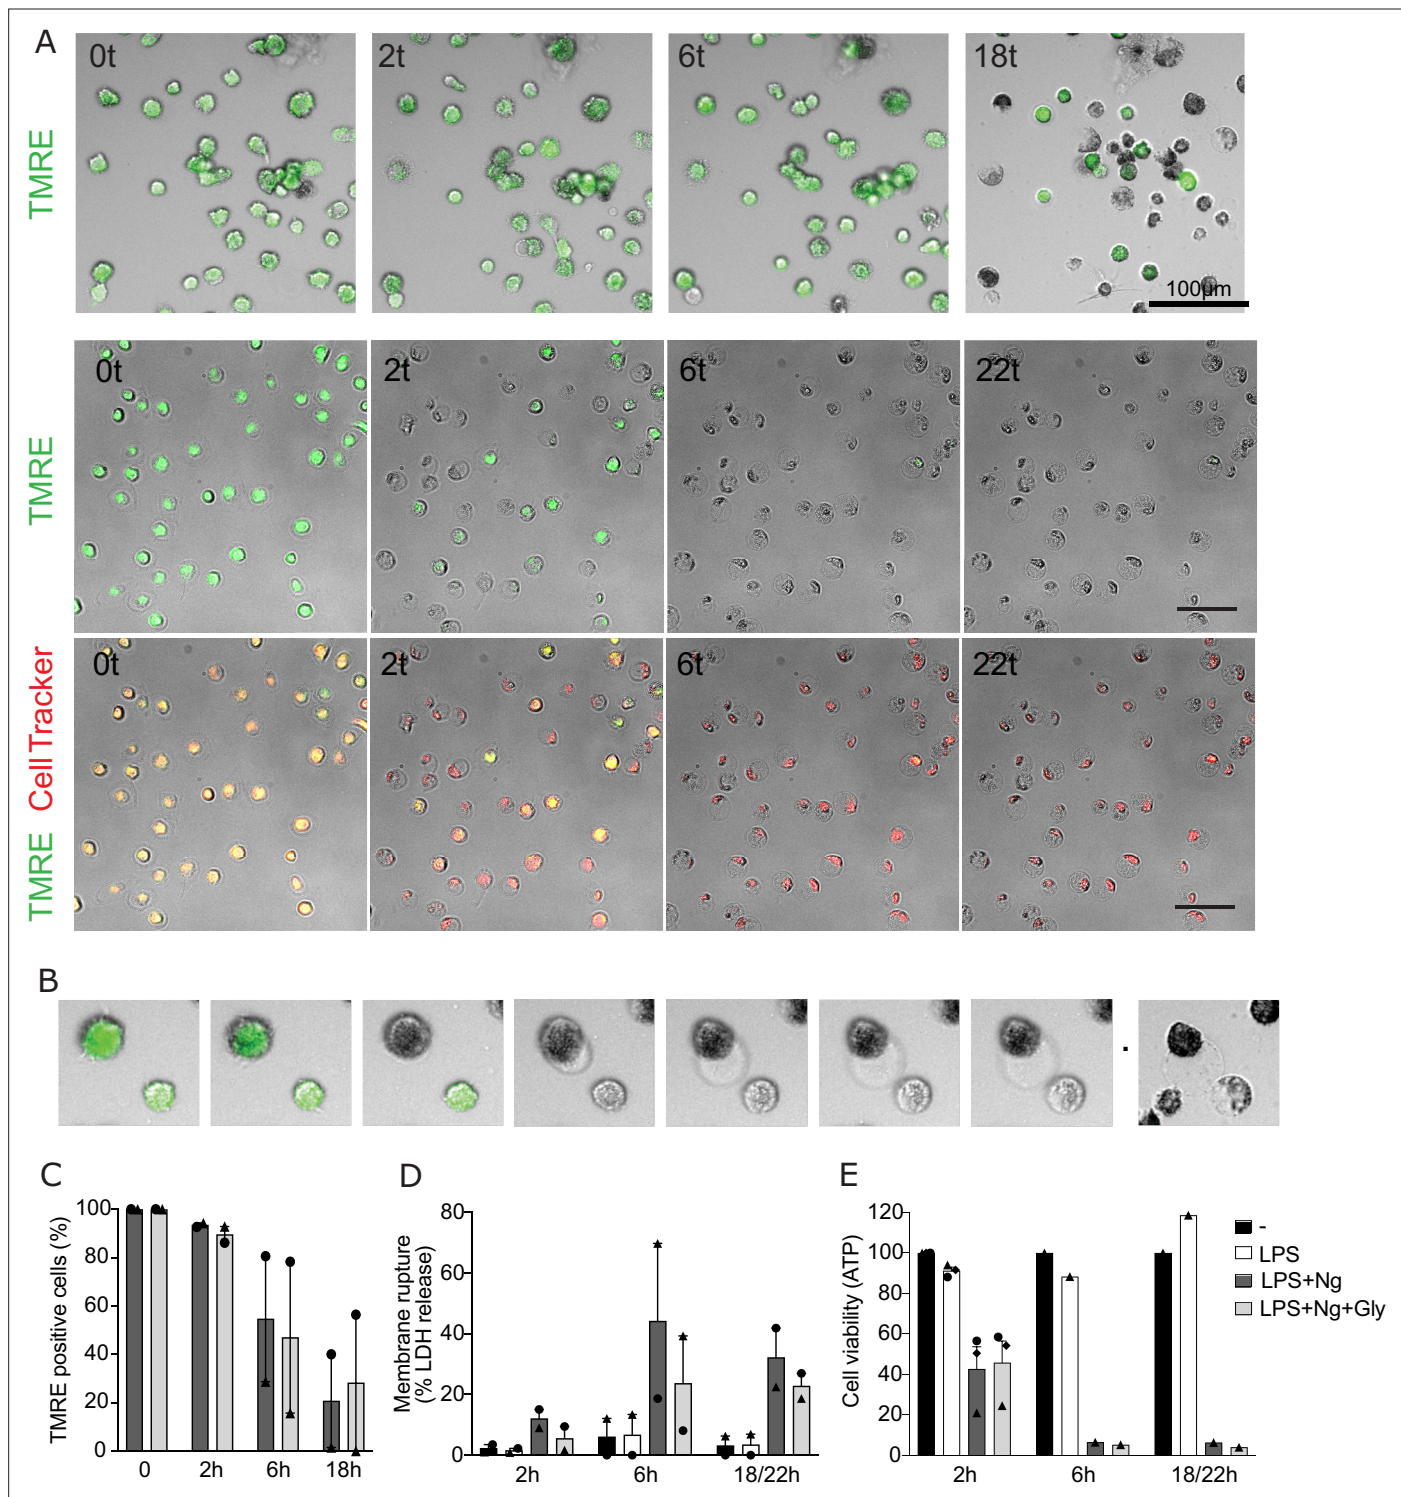

**Figure 2—figure supplement 3.** Glycine preserves membrane integrity but not cell viability in human macrophages undergoing pyroptosis. Human monocyte-derived macrophages (hMDMs) were either left untreated or pre-treated with glycine (50 mM) and primed with 1  $\mu$ g/mL LPS before stimulation with nigericin (20.7  $\mu$ M). To assay cell viability, the mitochondrial membrane potential sensitive dye tetramethylrhodamine ethyl ester (TMRE) perchlorate was added, and images were taken every 30 min overnight. **(A)** Representative images of TMRE staining (green) from two independent experiments where the second includes CellTracker Deep Red dye as a cellular marker (red, lower panel). Scale bars 100  $\mu$ m. **(B)** TMRE intensity decreases, and cells die prior to ballooning in cells undergoing pyroptosis (30 min between images shown, except last image which shows the same cell at 18 hr). **(C)** Frequency of TMRE positive cells, **(D)** LDH release, and **(E)** ATP content at indicated time points. Results from two to three independent experiments are shown in **(C–E)** with different symbols for individual donors.

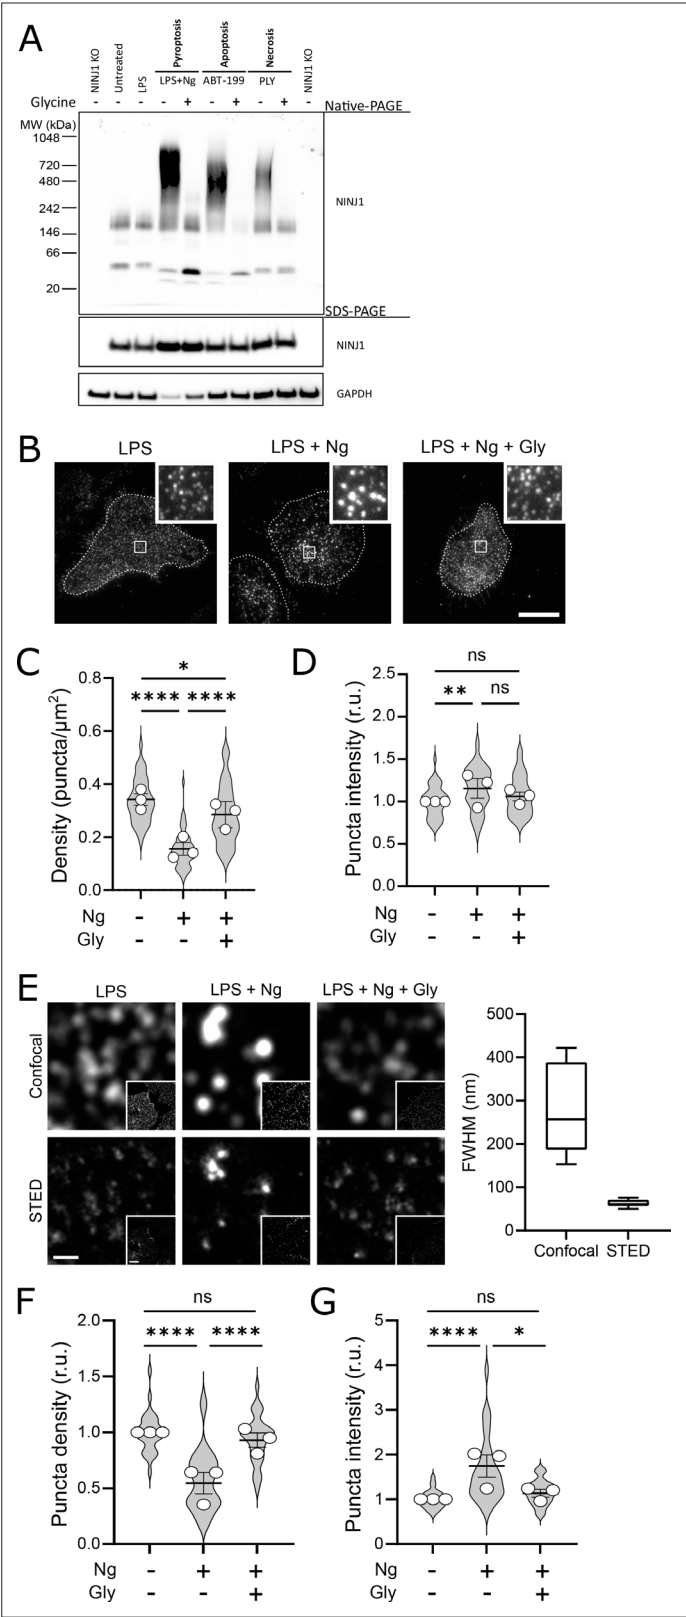

**Figure 3.** Glycine targets NINJ1 oligomerization to prevent membrane rupture in primary mouse macrophages. (A) Primary bone marrow-derived macrophage (BMDM) was induced to undergo pyroptosis (nigericin), apoptosis (venetoclax, ABT-199), or necrosis (pneumolysin) with or without glycine treatment. Native-PAGE analysis of endogenous NINJ1 demonstrates a shift to high molecular weight aggregate upon cell death stimulation, which

Figure 3 continued on next page

*Figure 3 continued*

is abrogated by glycine treatment. **(B)** Total internal reflection microscopy of NINJ1 in LPS-primed primary BMDM reveals that endogenous NINJ1 resides in discrete puncta within the plasma membrane. Cell membrane outline (dotted white line) was determined using fluorescently labeled cholera toxin subunit B (not shown) as a plasma membrane marker. Scale bar 20  $\mu\text{m}$ . Inset shows magnified area demarcated by the white box. Anti-mouse NINJ1 antibody validation for immunofluorescence is provided in **Figure 3—figure supplement 1**. Quantification of the density **(C)** and mean fluorescence intensity **(D)** of NINJ1 puncta in LPS-primed primary macrophages at baseline or stimulated to undergo pyroptosis (nigericin 20  $\mu\text{M}$  for 30 min) without or with glycine (5 mM). NINJ1 puncta become less dense and brighter upon pyroptosis induction, consistent with NINJ1 plasma membrane clustering. Glycine limits this redistribution. Violin plot of NINJ1 puncta density from three pooled independent experiments. Data points superimposed on the violin plots are the mean NINJ1 puncta densities for the three independent experiments (10–23 cells measured per replicate with >675 NINJ1 puncta identified per replicate). Bars represent mean  $\pm$  SEM of the NINJ1 densities for the  $n=3$  independent experiments. \*  $p<0.05$ , \*\*  $p<0.01$ , and \*\*\*\*  $p<0.0001$  by Kruskal–Wallis test with Dunn’s multiple comparison correction. **(E)** Representative confocal (top) and stimulated emission depletion (STED; bottom) images of LPS-primed primary mouse bone marrow-derived macrophage (BMDM) at baseline or stimulated to undergo pyroptosis (nigericin 20  $\mu\text{M}$  for 30 min) without or with glycine (5 mM). Full-width at half maximum of identified NINJ1 puncta shows a resolution of  $271\pm 98$  nm and  $63\pm 8$  nm (mean  $\pm$  SD) for standard confocal and STED microscopy, respectively. Scale bar 0.5  $\mu\text{m}$ ; inset scale bar 20  $\mu\text{m}$ . **(F–G)** Quantification of the normalized NINJ1 puncta density **(F)** and mean fluorescence intensity **(G)** from the STED images. The NINJ1 puncta become less dense with a corresponding increase in fluorescence intensity upon pyroptosis induction, consistent with NINJ1 plasma membrane clustering. Glycine limits these effects. Violin plot of the individual NINJ1 puncta from three pooled independent experiments (8–14 cells per replicate with >4964 NINJ1 puncta identified per replicate). Bars represent mean  $\pm$  SEM of the NINJ1 densities for the  $n=3$  independent experiments. \*  $p<0.05$  and \*\*\*\*  $p<0.0001$  by Kruskal–Wallis test with Dunn’s multiple comparison correction.

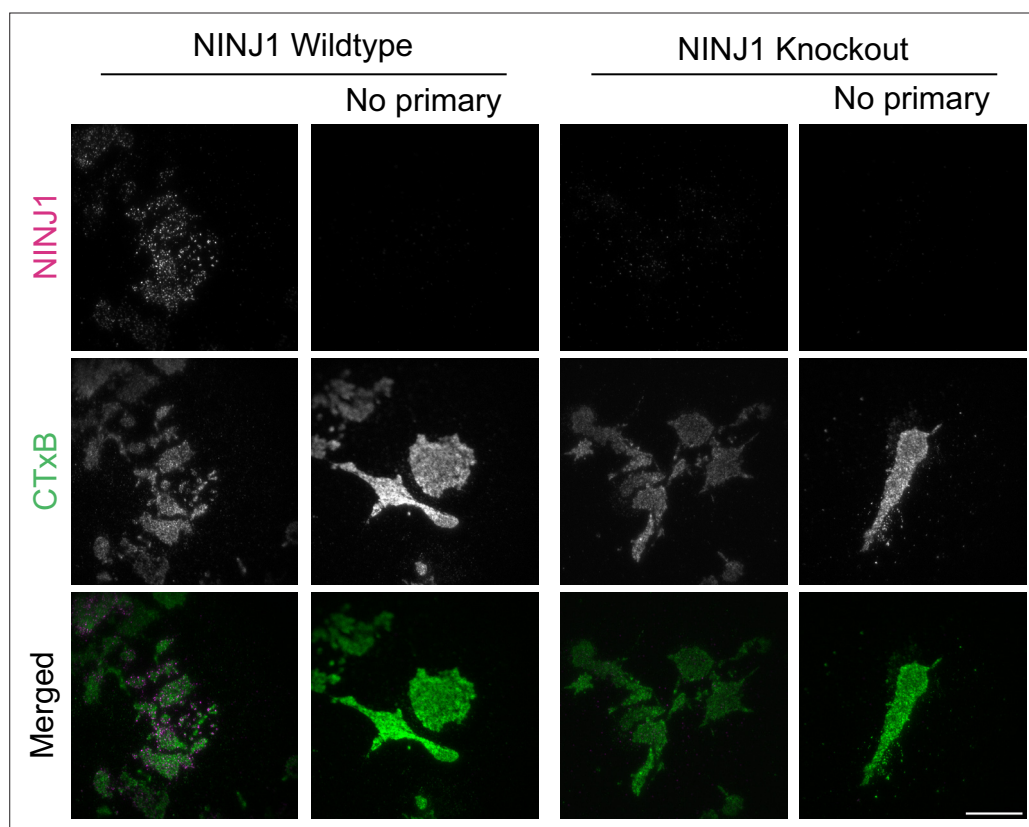

**Figure 3—figure supplement 1.** Rabbit anti-mouse NINJ1 monoclonal antibody validation. Wildtype and *Ninj1* knockout primary mouse bone marrow-derived macrophage (BMDM) were fixed and stained with or without the rabbit anti-mouse NINJ1 monoclonal antibody as described in the main text prior to imaging by total internal reflection fluorescence (TIRF) microscopy. The cell plasma membrane was stained using fluorescent cholera toxin subunit B (CTxB). Scale bar 15  $\mu$ m.

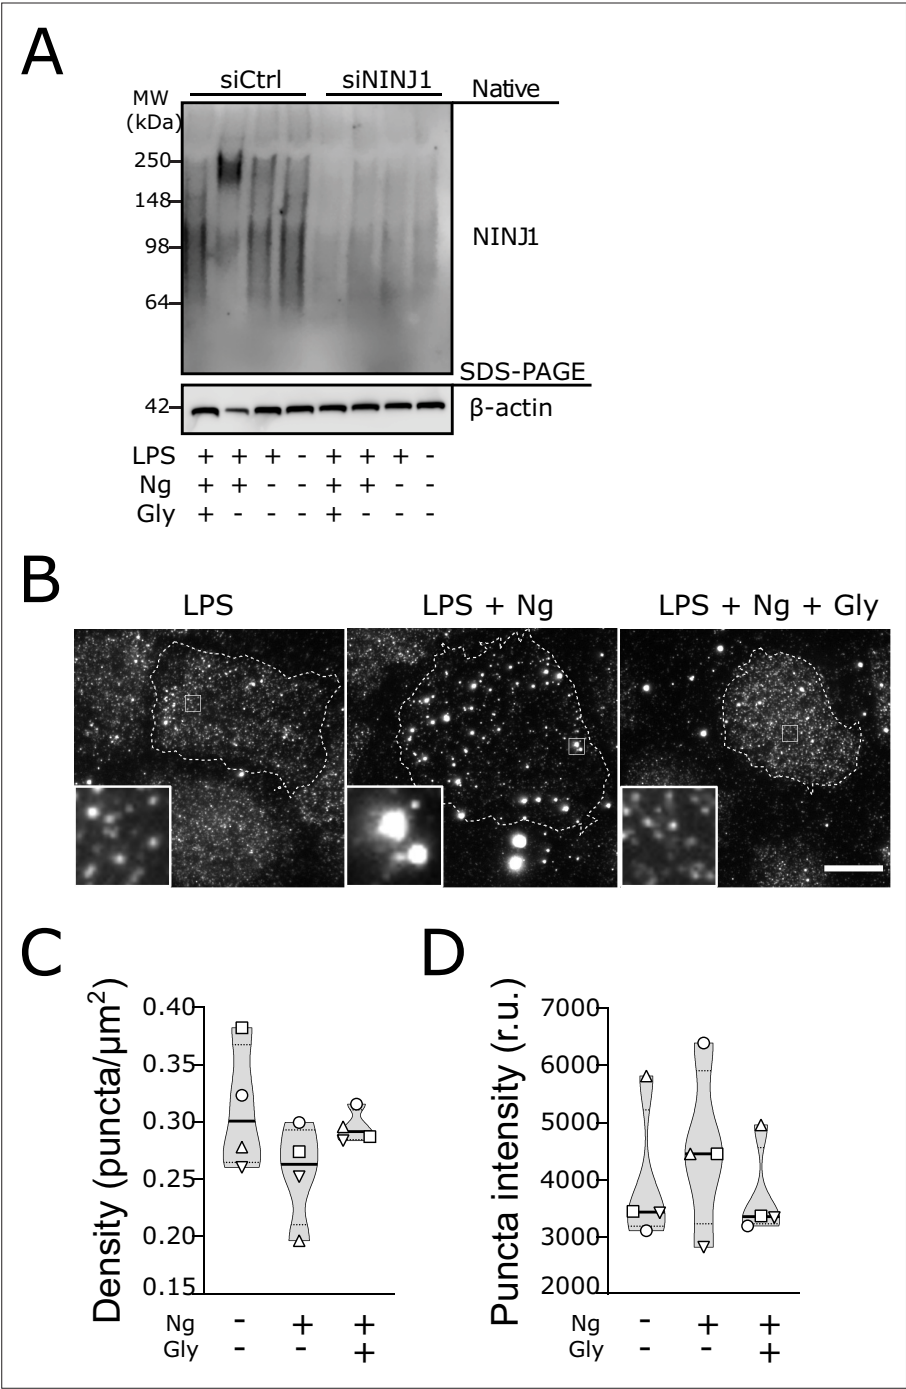

**Figure 4.** Glycine targets NINJ1 oligomerization to prevent membrane rupture in primary human macrophages. (A) Native-PAGE analysis of endogenous NINJ1 from human monocyte-derived macrophages (hMDMs) stimulated to undergo pyroptosis displays a shift to higher molecular weight, which is abrogated by glycine treatment. NINJ1 levels are almost absent in siNINJ1-treated cells (quantification in **Figure 4—figure supplement 2A**), and no shift is seen after LPS and nigericin treatment. (B) Total internal reflection fluorescence (TIRF) microscopy of LPS-primed primary hMDMs shows endogenous NINJ1 in discrete plasma membrane puncta. Cell membrane outline (dotted white line) was determined using fluorescently labeled cholera toxin subunit B (not shown) as a plasma membrane marker. Scale bar 20  $\mu\text{m}$ . Anti-human NINJ1 antibody validation for immunofluorescence is provided in **Figure 4—figure supplement 1**. Quantification of the NINJ1 puncta density (C) and fluorescence intensity (D) in LPS-primed hMDMs at baseline or stimulated to undergo pyroptosis (nigericin 20.7  $\mu\text{M}$  for 2 hr) without or with glycine (50 mM). Violin plot of NINJ1 puncta density and intensity quantified from images of cells from four independent

Figure 4 continued on next page

*Figure 4 continued*

donors. Mean of NINJ1 puncta densities from three cells per donor per condition shown as superimposed datapoints (different symbols are used for individual donors) along with median and quartiles for each condition.



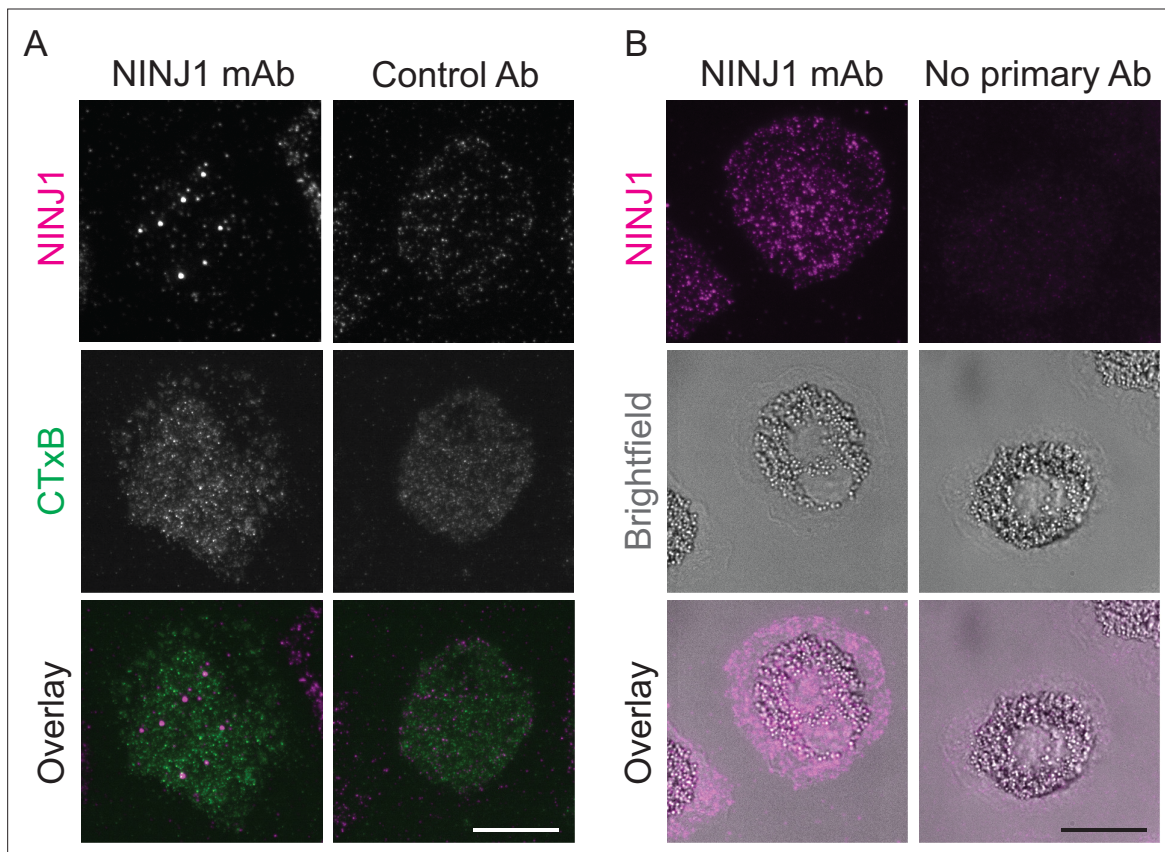

**Figure 4—figure supplement 1.** Mouse anti-human NINJ1 monoclonal antibody validation. LPS and nigericin treated human monocyte-derived macrophages (hMDMs) were fixed and stained with the indicated antibodies as described in the main text prior to imaging by total internal reflection fluorescence (TIRF) microscopy. **(A)** Cells were stained with mouse anti-human NINJ1 (IgG2b) Ab or a control Ab (mouse IgG2a) followed by fluorescent rabbit anti-mouse Ab. The cell plasma membrane was stained using fluorescent cholera toxin subunit B (CTxB). **(B)** In a separate experiment, cells were stained with mouse anti-human NINJ1 (IgG2b) Ab or no primary Ab, followed by fluorescent rabbit anti-mouse Ab. Scale bars 20  $\mu$ m.



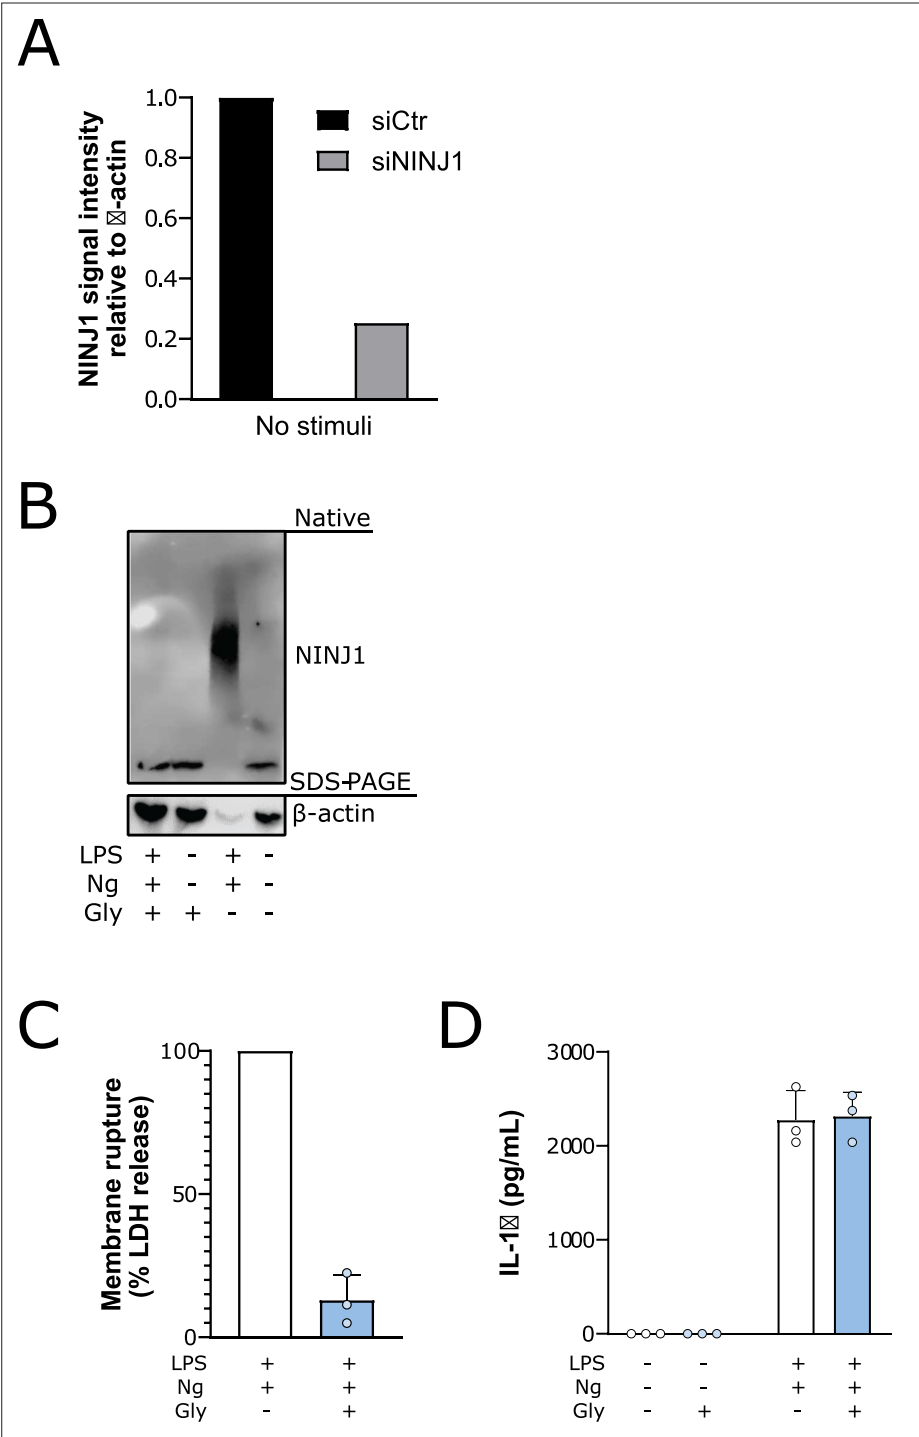

**Figure 4—figure supplement 2.** Glycine prevents NINJ1 aggregation and pyroptotic lysis in induced pluripotent stem-cell (iPSC) derived human macrophages (iPSDMs) without affecting IL-1 $\beta$  secretion. **(A)** Quantification of NINJ1 native-PAGE signal from unstimulated human monocyte-derived macrophage (hMDM) lysates confirm NINJ1 silencing in siNINJ1-treated cells compared to siCtrl-treated cells. **(B–D)** iPSDMs were LPS-primed and stimulated to undergo pyroptosis with nigericin in the presence or absence of 50 mM glycine. **(B)** Native-PAGE analysis of endogenous NINJ1 in iPSDMs display a shift to higher molecular weight when cells are stimulated to undergo pyroptosis, which is abrogated by glycine pretreatment. **(C)** LDH release was measured in the supernatants to assess cell rupture and was reduced with glycine co-treatment. Data are expressed as % of LDH in supernatant from LPS and nigericin-treated cells in  $n=3$  independent experiments. Data points from each experiment is shown along with their mean and SD. **(D)** IL-1 $\beta$  release from pyroptotic cells was not altered by the

Figure 4—figure supplement 2 continued on next page

*Figure 4—figure supplement 2 continued*

presence of glycine. Data points from three technical replicates from one experiment are shown along with their mean and SD.

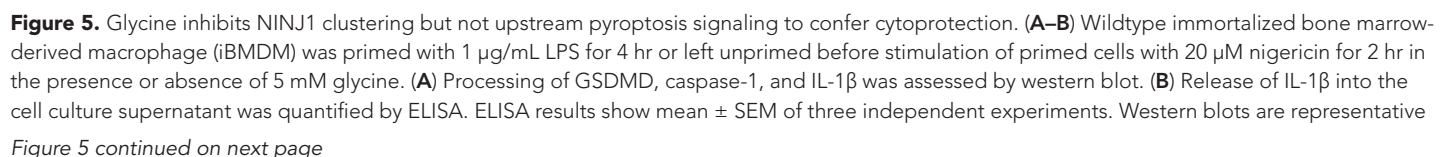

## Figure 5 continued

of three independent experiments. \*\*\* $p < 0.001$  and \*\*\*\* $p < 0.0001$  by one-way ANOVA with Tukey's multiple comparison correction. **(C–D)** Glycine dose-dependently inhibits plasma membrane rupture in mouse macrophages overexpressing NINJ1 or the N-terminal fragment of GSDMD. iBMDMs with doxycycline-inducible expression of FLAG-tagged NINJ1 **(C)** or the N-terminal fragment of GSDMD fused to BFP (blue fluorescent protein) **(D)** were incubated with 2  $\mu\text{g/mL}$  doxycycline and increasing concentrations of glycine for 12 hr or 8 hr, respectively, before analyses of cell rupture (LDH release) and protein expression. Left: LDH release in supernatants relative to full lysis controls. Middle: frequencies of NINJ1-FLAG-positive or GSDMD-NT-BFP-positive cells. Right: surface expression of NINJ1-FLAG or GSDMD-NT-BFP by mean fluorescence intensity. \*  $p < 0.05$ , \*\* $p < 0.01$ , \*\*\* $p < 0.001$ , and \*\*\*\* $p < 0.0001$  by two-sided ANOVA with Tukey's multiple comparison correction. **(E)** HeLa cells were transiently transfected with HA-tagged mouse NINJ1 in the presence or absence of glycine (5 mM). Native-PAGE analysis of ectopically expressed NINJ1 demonstrates a shift to high molecular weight aggregate, which is abrogated by glycine treatment. **(F)** Large unilamellar vesicles (LUVs; gray circles) were made containing 25 mM carboxyfluorescein (CF) at which the CF fluorescence self-quenches. NINJ1  $\alpha$ -helix peptide (corresponding to amino acids 40–69 of human NINJ1) is added to the LUV suspension. Ruptured LUV release CF, which no longer self-quenches. The resulting increase in fluorescence is monitored using a spectrofluorometer. Detergent is added to rupture all remaining liposomes to capture the maximum attainable fluorescence. LUV rupture by N-terminus NINJ1  $\alpha$ -helix without and with glycine (50 mM), scrambled NINJ1  $\alpha$ -helix peptide, or the cytolytic yeast peptide candidalysin compared to vehicle. Glycine does not prevent LUV rupture by the N-terminal NINJ1  $\alpha$ -helix. \*  $p < 0.05$  by ANOVA with Tukey's multiple comparison correction.

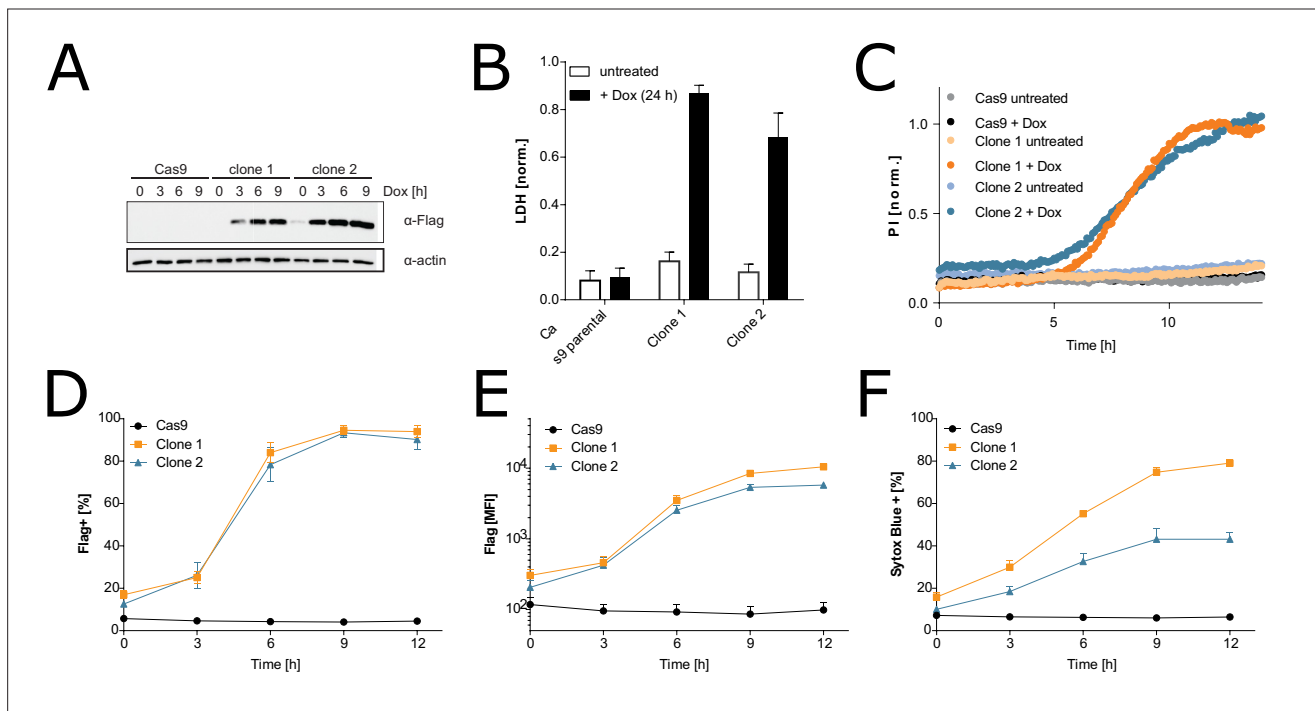

**Figure 5—figure supplement 1.** Characterization of the inducible immortalized bone marrow-derived macrophage (iBMDM)-doxy-moNINJ1 system. Two clonal cell lines expressing FLAG-NINJ1 under a doxy-inducible promoter or the parental Cas9 + iBMDM cell line were treated with 2  $\mu$ g/mL of doxycycline for the indicated times. **(A)** Expression of FLAG-NINJ1 in whole cell lysates was analyzed by western blot. **(B)** Cell membrane rupture was assessed by LDH assay. **(C)** Membrane permeabilization over time was analyzed by PI(propidium iodide) staining. **(D–F)** Cell surface expression of FLAG-NINJ1 and plasma membrane permeabilization (Sytox Blue positive) was analyzed by flow cytometry.

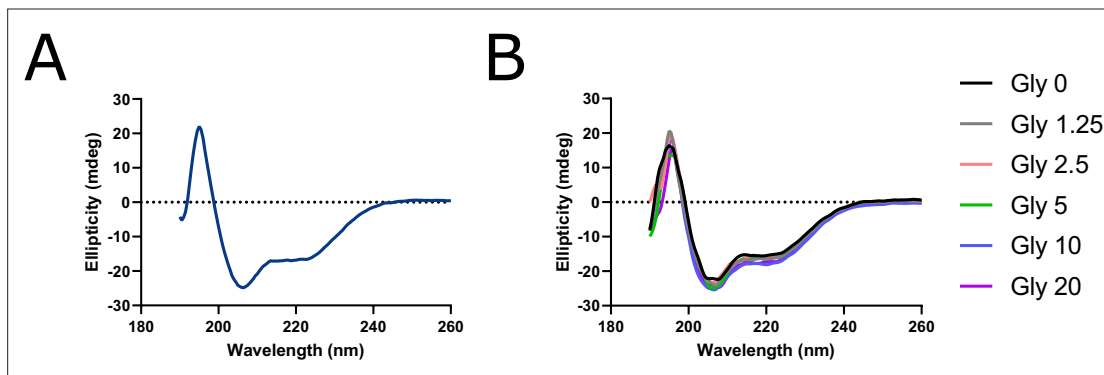

**Figure 5—figure supplement 2.** Circular dichroism (CD) spectroscopy of human NINJ1 peptide reveals a stable  $\alpha$ -helical secondary structure insensitive to glycine. **(A)** CD spectrum of NINJ1 amino acids 40–69 (HYASKKSAAESMLDIALLMANASQLKAVE) shows the characteristic pattern of an  $\alpha$ -helix with two downward deflections at 207 nm and 222 nm. **(B)** CD spectra of the human NINJ1  $\alpha$ -helix co-incubated with glycine titrated between 0 and 20 mM indicate that the helical secondary structure is generally insensitive to glycine.
