# Supplementary figures and images for: Glycine inhibits NINJ1 membrane clustering to suppress plasma membrane rupture in cell death
Source: eLife journal article supplement (doi:10.7554/elife.78609), 2022-12-05

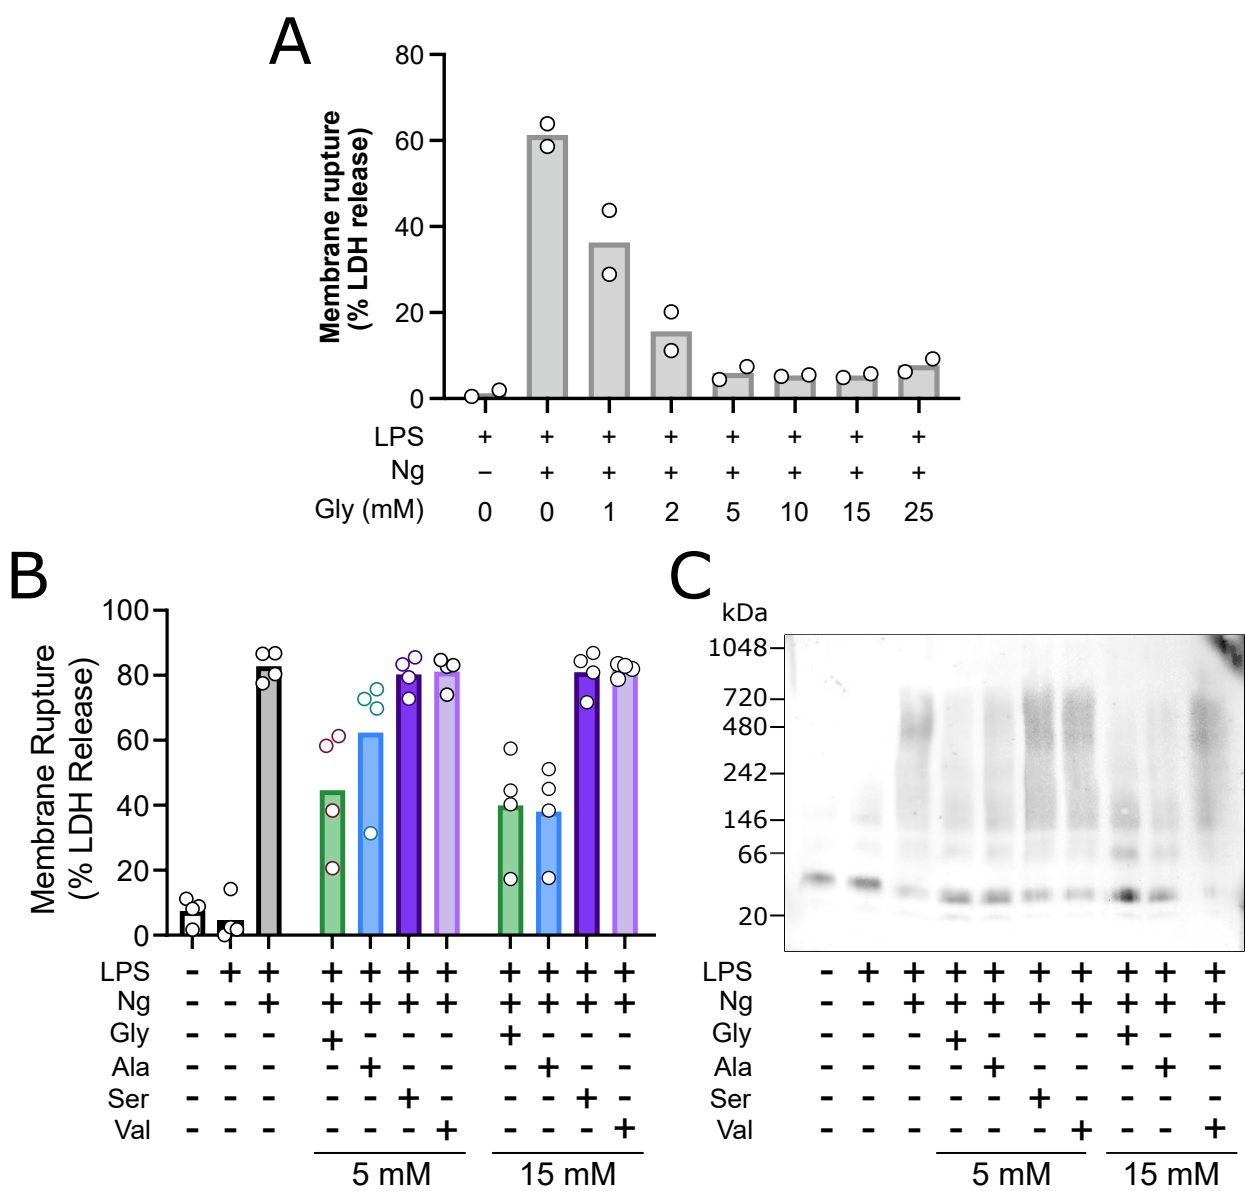

Figure 1 - Supplement 1

Supplement: supp [file elife_poa_e78609_Figure_1_figure_supplement_1.pdf › elife_poa_e78609_Figure_1_figure_supplement_1.pdf]

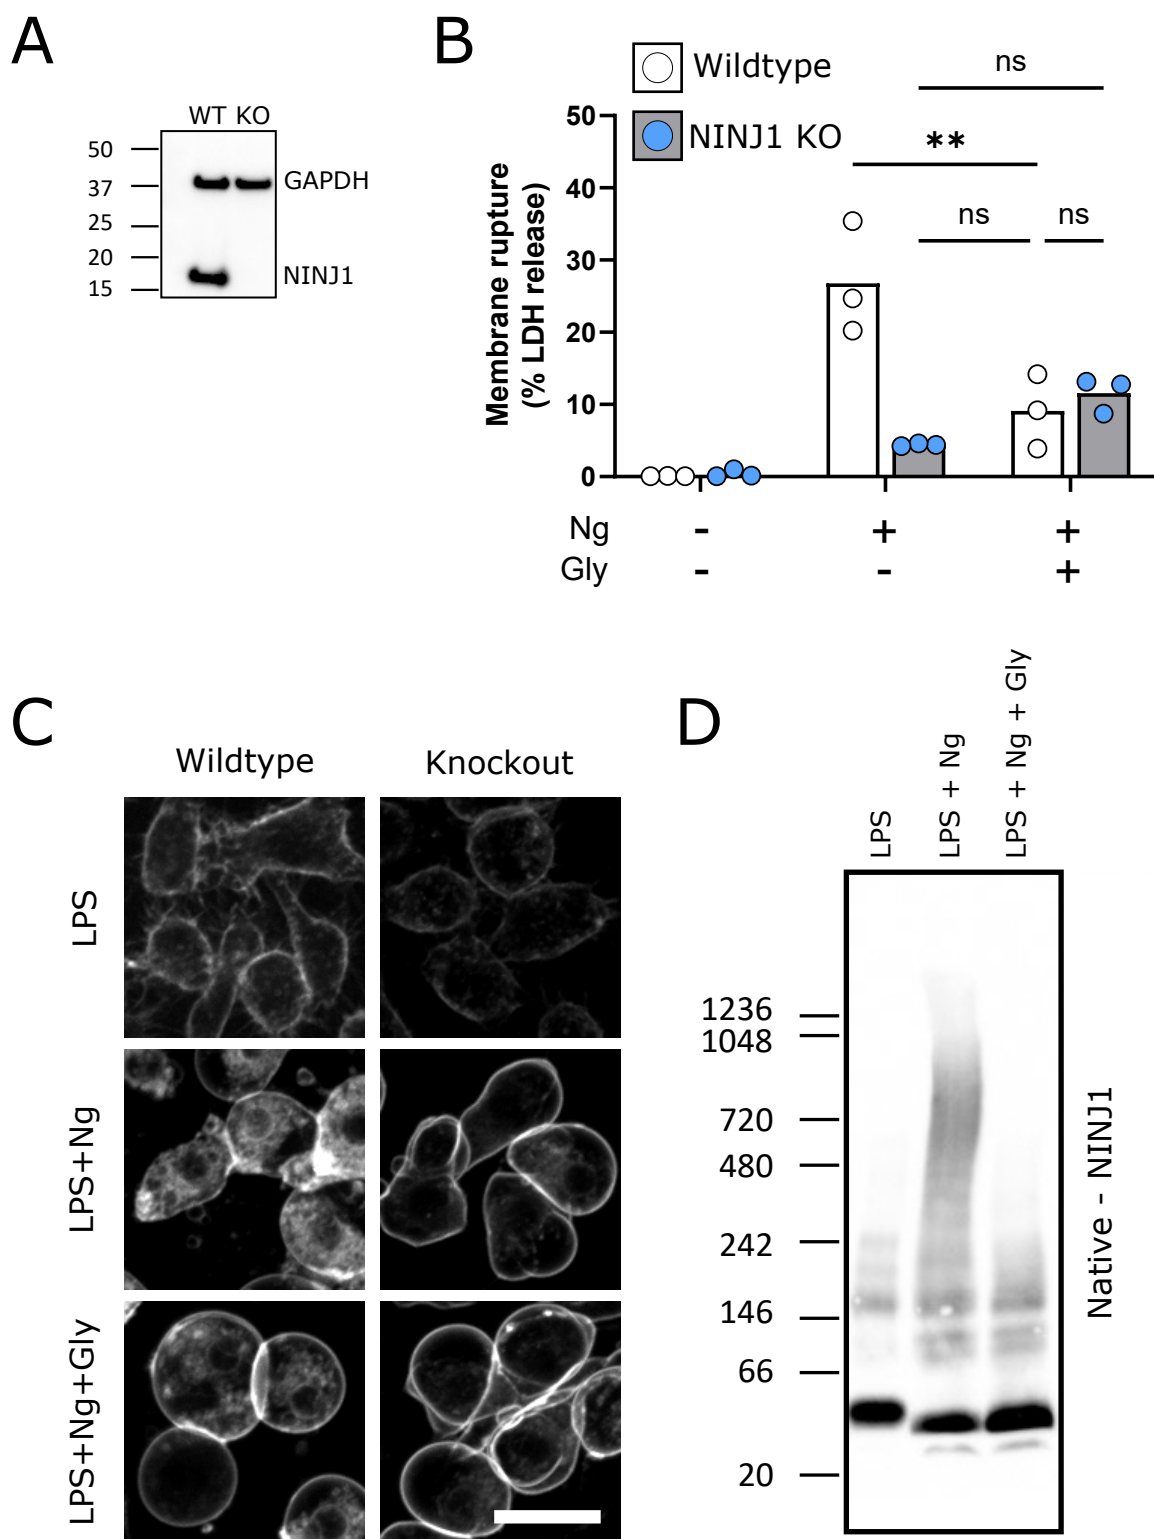

Figure 1 - Supplement 2

Supplement: supp [file elife_poa_e78609_Figure_1_figure_supplement_2.pdf › elife_poa_e78609_Figure_1_figure_supplement_2.pdf]

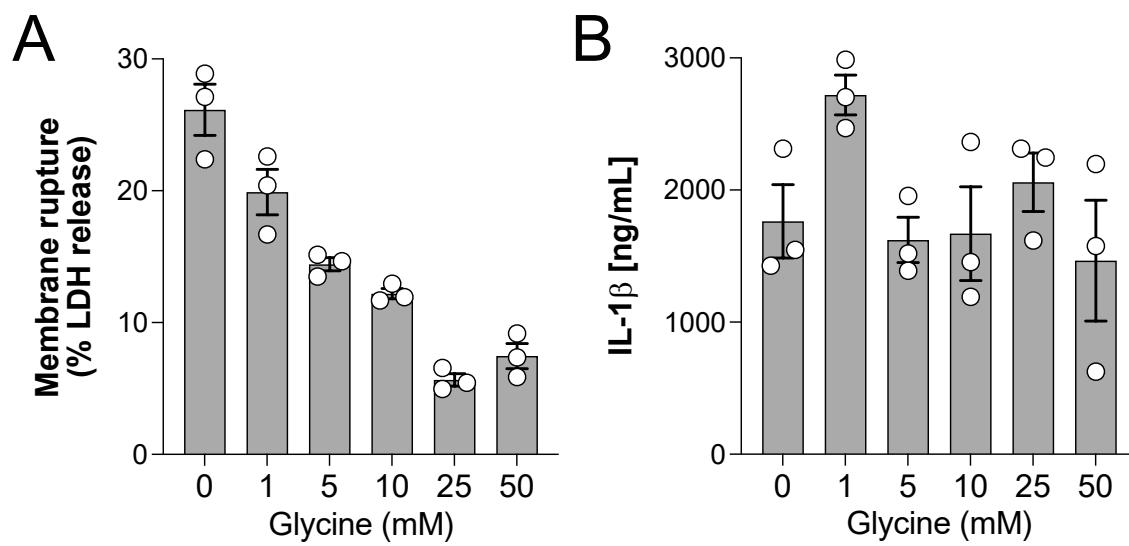

Figure 2 - Supplement 1

Supplement: supp [file elife_poa_e78609_Figure_2_figure_supplement_1.pdf › elife_poa_e78609_Figure_2_figure_supplement_1.pdf]

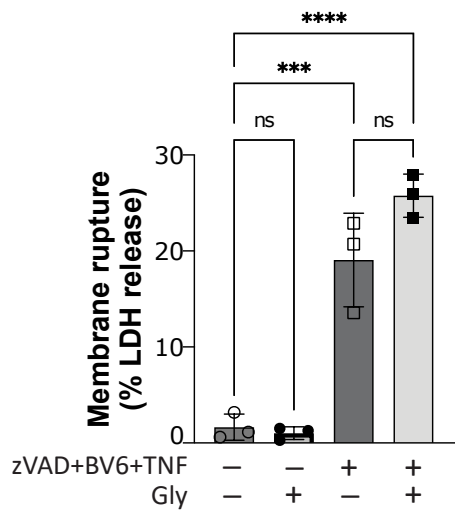

Figure 2 - Supplement 2

Supplement: supp [file elife_poa_e78609_Figure_2_figure_supplement_2.pdf › elife_poa_e78609_Figure_2_figure_supplement_2.pdf]

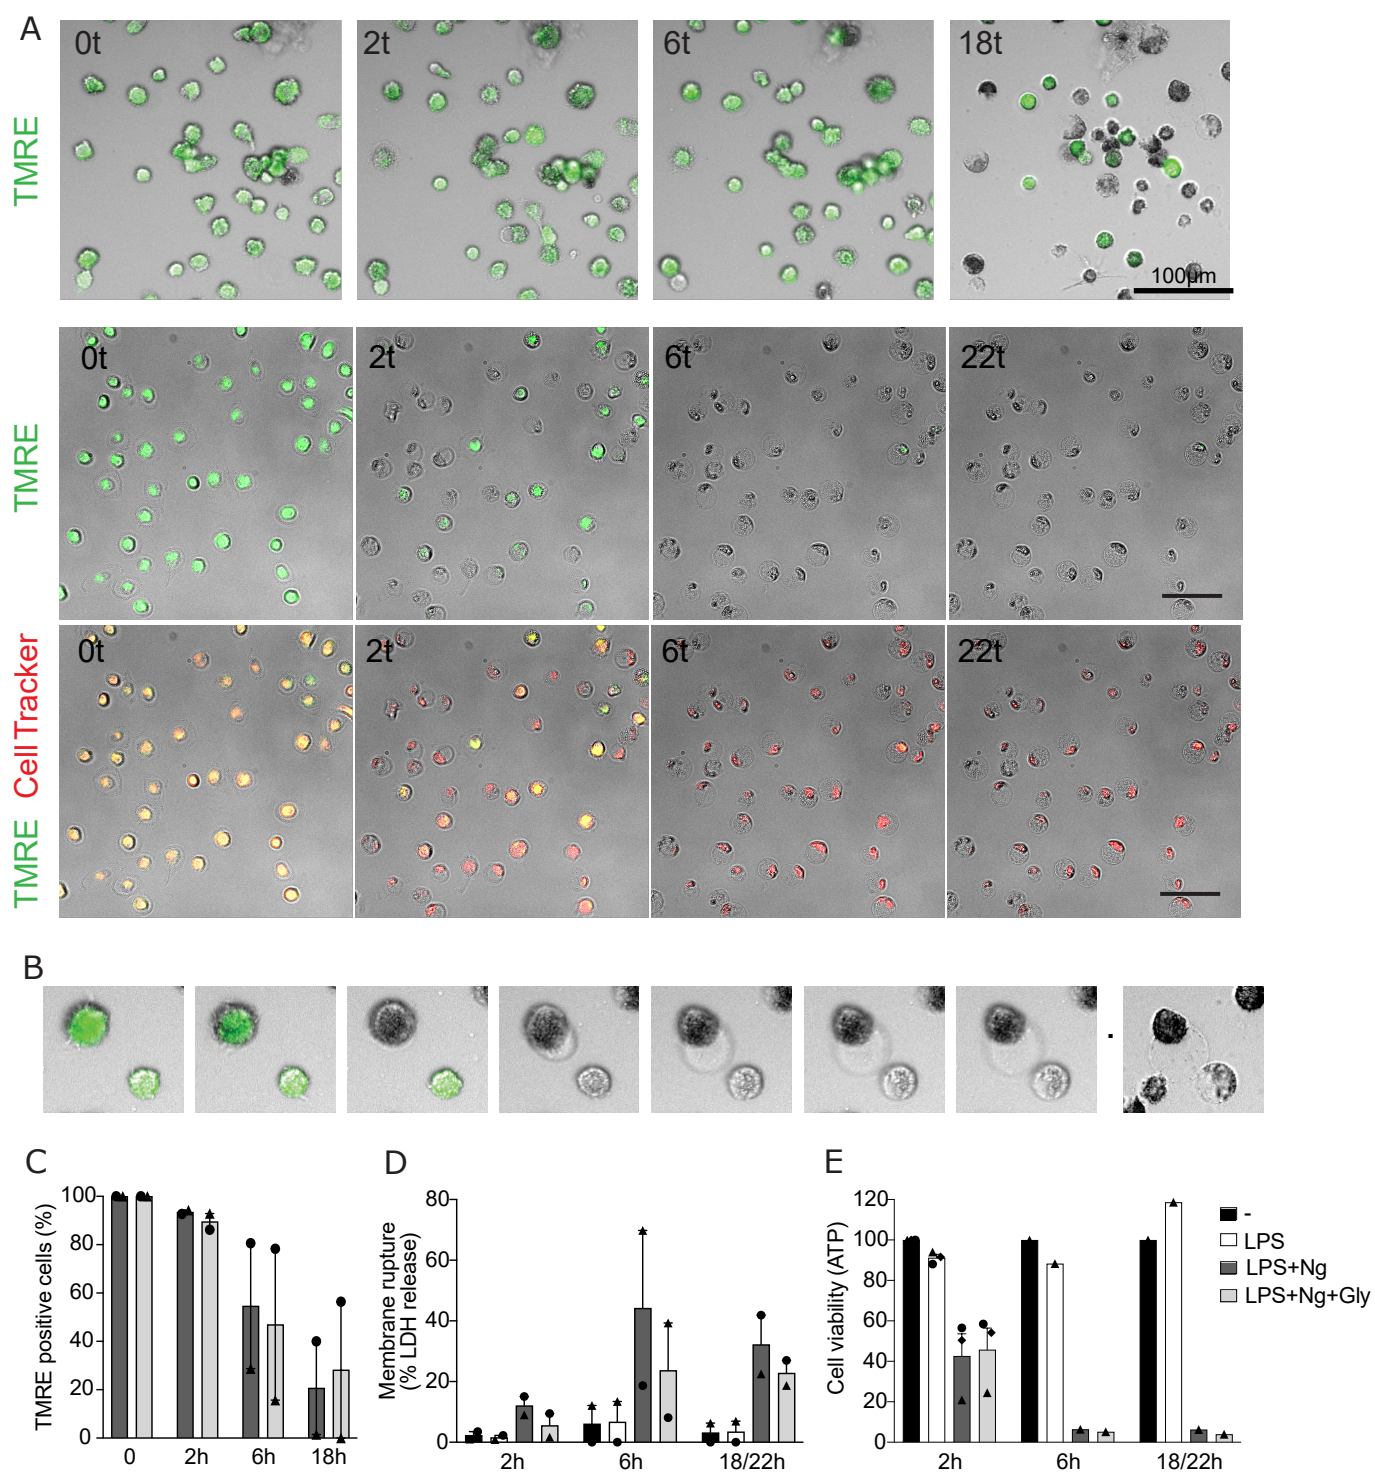

Figure 2 - Supplement 3

Supplement: supp [file elife_poa_e78609_Figure_2_figure_supplement_3.pdf › elife_poa_e78609_Figure_2_figure_supplement_3.pdf]

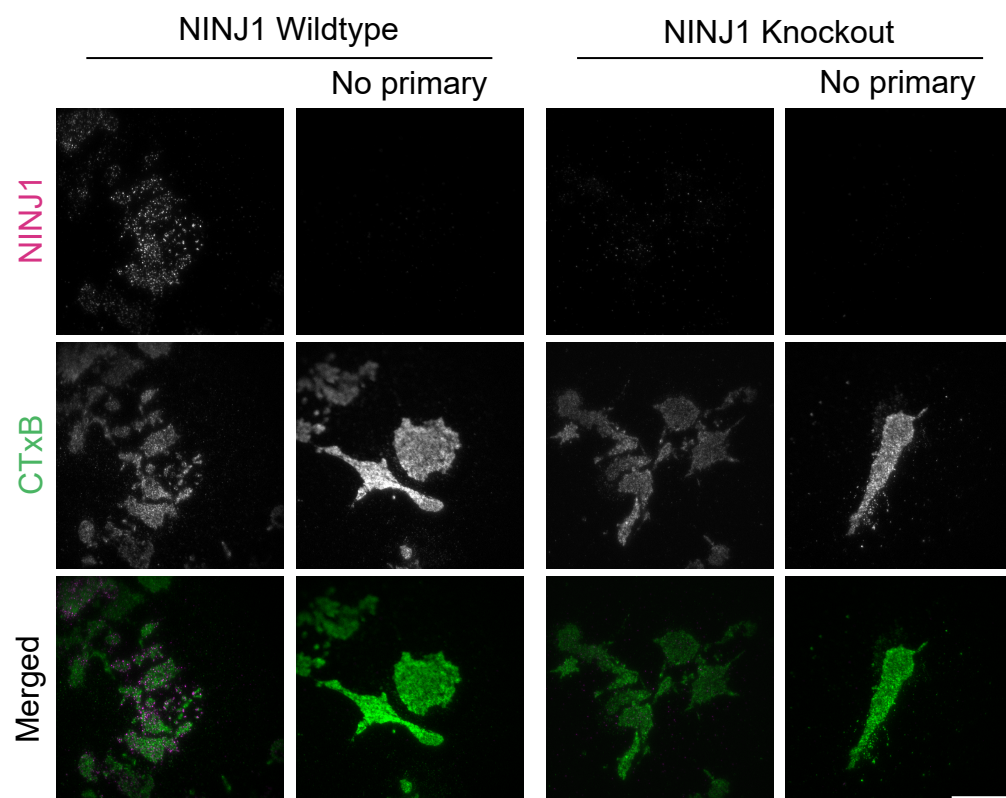

Figure 3 - Supplement 1

Supplement: supp [file elife_poa_e78609_Figure_3_figure_supplement_1.pdf › elife_poa_e78609_Figure_3_figure_supplement_1.pdf]

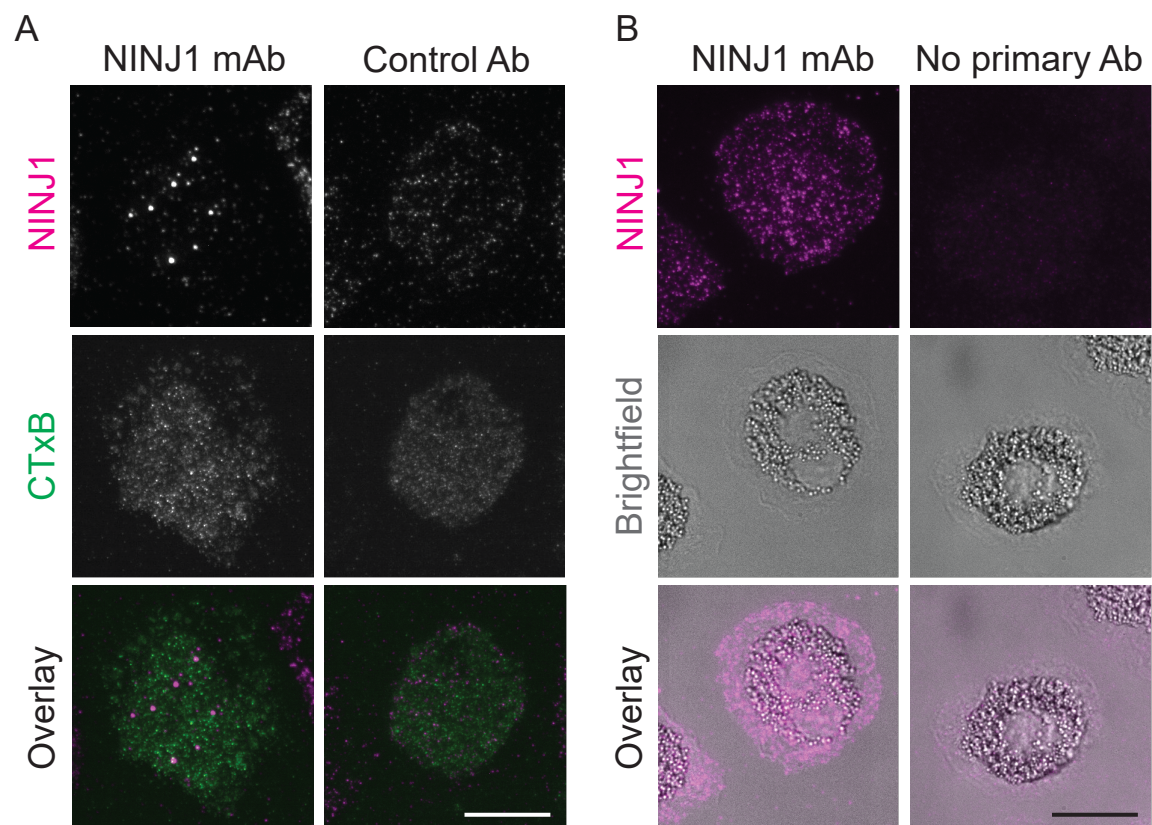

Figure 4 - Supplement 1

Supplement: supp [file elife_poa_e78609_Figure_4_figure_supplement_1.pdf › elife_poa_e78609_Figure_4_figure_supplement_1.pdf]

**A**

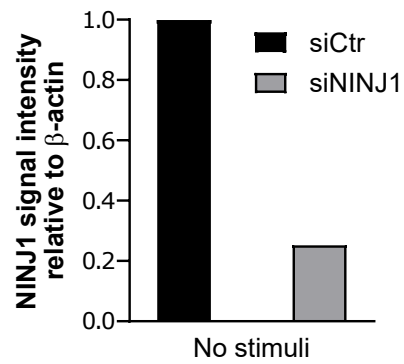

**B**

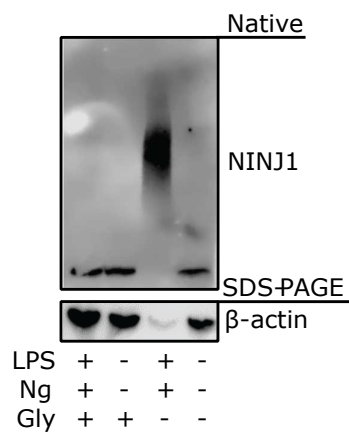

**C**

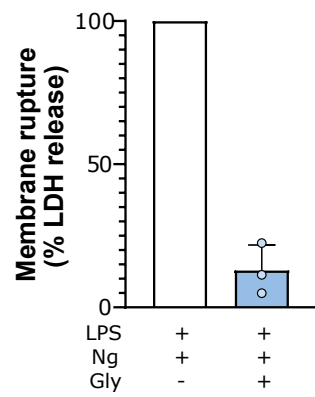

**D**

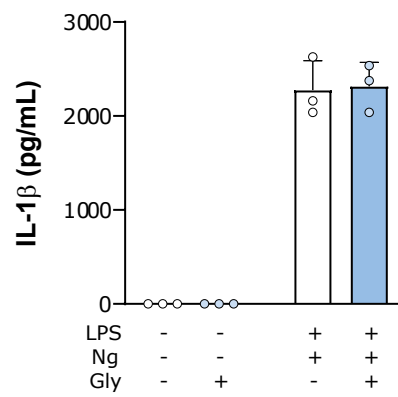

Figure 4 - Supplement 2

Supplement: supp [file elife_poa_e78609_Figure_4_figure_supplement_2.pdf › elife_poa_e78609_Figure_4_figure_supplement_2.pdf]

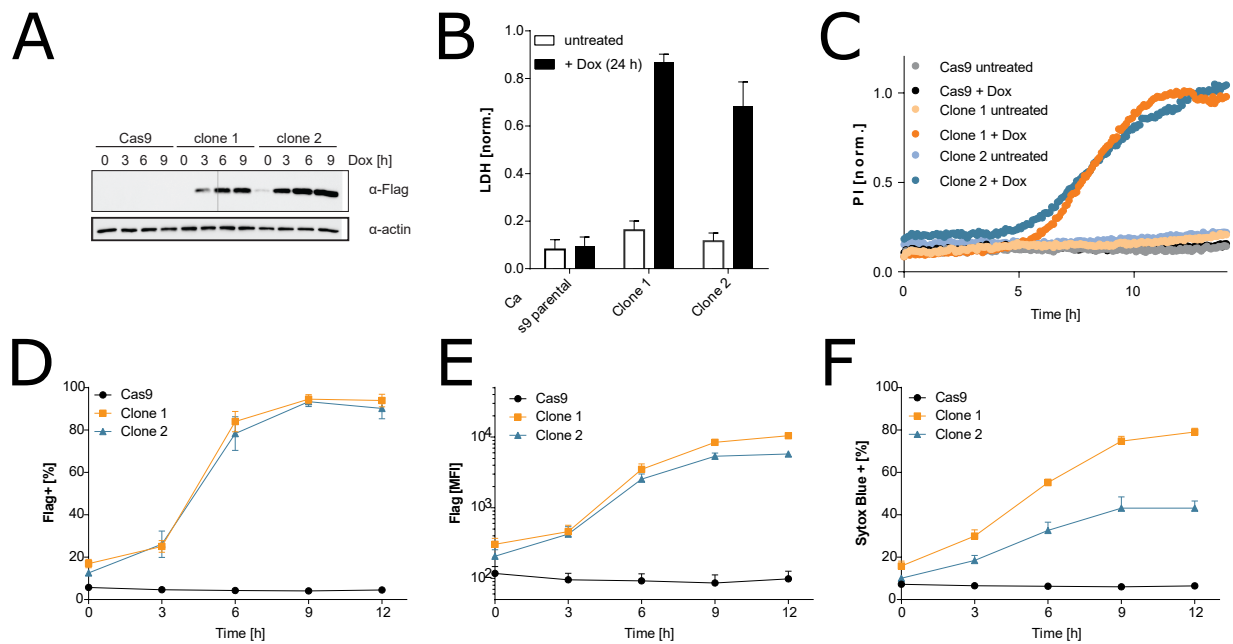

Figure 5 - Figure Supplement 1

Supplement: supp [file elife_poa_e78609_Figure_5_figure_supplement_1.pdf › elife_poa_e78609_Figure_5_figure_supplement_1.pdf]

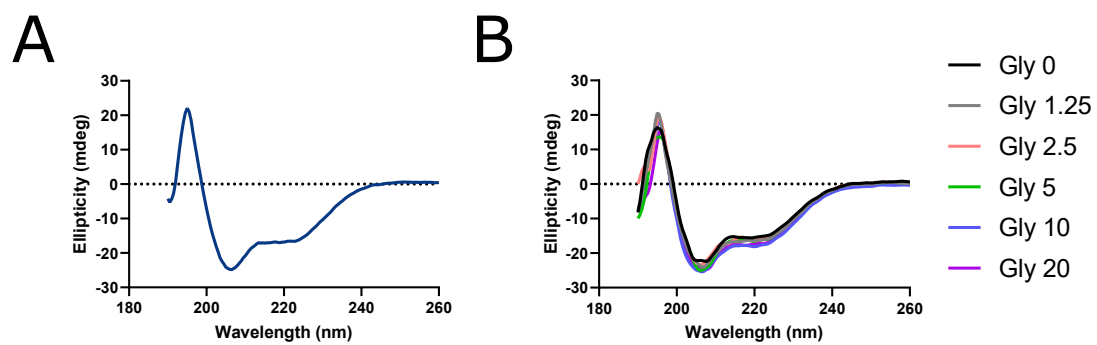

Figure 5 - Supplement 2

Supplement: supp [file elife_poa_e78609_Figure_5_figure_supplement_2.pdf › elife_poa_e78609_Figure_5_figure_supplement_2.pdf]
